1 **Full title:**

2 Lipid and nucleocapsid N-protein accumulation in COVID-19  
3 patient lung and infected cells

4

5 **Short title:**

6 SARS-CoV-2 infection induces lipid and N-protein  
7 accumulation

8

9 Anita E. Grootemaat<sup>1</sup>, Sanne van der Niet<sup>1</sup>, Edwin R. Scholl<sup>1</sup>, Eva Roos<sup>2</sup>, Bernadette Schurink<sup>2</sup>,  
10 Marianna Bugiani<sup>2</sup>, Sara E. Miller<sup>3</sup>, Per Larsen<sup>1,2</sup>, Jeannette Pankras<sup>1,2</sup>, Eric A. Reits<sup>1</sup>, Nicole N. van  
11 der Wel<sup>1\*</sup>

12 **Contact information**

13 <sup>1</sup>Electron Microscopy Centre Amsterdam, Medical Biology, Amsterdam University Medical Centre  
14 AMC, the Netherlands

15 <sup>2</sup>Department of Pathology, Amsterdam University Medical Centers (UMC), VU University Amsterdam,  
16 Amsterdam, the Netherlands

17 <sup>3</sup>Department of Pathology, Duke University Medical Center, Durham, NC, USA

18

19 \*Corresponding author: Nicole van der Wel

20 email address: n.n.vanderwel@amsterdamumc.nl

## 21 **Abstract**

22 The pandemic of the severe acute respiratory syndrome coronavirus 2 (SARS-CoV-2) has caused a  
23 global outbreak and prompted an enormous research effort. Still, the subcellular localization of the  
24 corona virus in lungs of COVID-19 patients is not well understood. Here, the localization of the  
25 SARS-CoV-2 proteins is studied in postmortem lung material of COVID-19 patients and in SARS-  
26 CoV-2 infected Vero cells, processed identically. Correlative light and electron microscopy on semi-  
27 thick cryo-sections, demonstrated induction of electron-lucent, lipid filled compartments after SARS-  
28 CoV-2 infection in both lung and cell cultures. In infected Vero cells and using immuno-electron  
29 microscopy, viral proteins were detected in these lipid filled compartments. In addition, several viral  
30 proteins were detected in virus particles, Golgi, double membrane spherules and multiple-virus bodies  
31 which were not lysosomal. In lung tissue, the non-structural protein 4 and the stable nucleocapsid N-  
32 protein, were detected on membranes of lipid filled compartments. The induction of such lipid filled  
33 compartments and the localisation of the viral proteins in lung of patients with fatal COVID-19, may  
34 explain the extensive inflammatory response.

35

## 36 **Authors Summary**

37 The trafficking of coronaviruses in lung of COVID-19 patients is not well understood and virus  
38 particles are difficult to find. Here we have visualized virus particles in SARS-CoV-2 infected cells by  
39 focusing on viral protein detection, in combination with ultrastructure. We studied how the virus is  
40 altering the cell morphology and determined that in Vero cells, lipid filled compartments contained  
41 various viral proteins. In these cells, also membrane enclosed multi-virus bodies were visible that  
42 contain a different set of viral proteins. We demonstrated that lipid filled compartments are viral  
43 induced compartments, as no known cellular marker such as lipid droplet or lysosomal marker was  
44 present. Using this knowledge, we then studied lung tissue from patients with a fatal SARS-Cov-2  
45 infection, processed in a similar manner. Again we detected lipid filled compartments, now with viral

46 proteins nsp4 and the stable nucleocapsid N-protein. The presence of these lipid filled compartments  
47 with viral proteins induced by SARS-CoV-2 infections, could be why the immune response of the  
48 COVID-19 patients is so strong, resulting in a fatal infection, and should be considered for new  
49 therapeutic strategies.

50

## 51 **Introduction**

52 The outbreak of Severe Acute Respiratory Syndrome Coronavirus 2 (SARS-CoV-2) in late 2019 is the  
53 third major outbreak of  $\beta$ -coronaviruses in the human population of the past two decennia, together  
54 with the smaller outbreaks of Severe Acute Respiratory Syndrome Coronavirus (SARS-CoV-1) in  
55 2003 and Middle East Respiratory Syndrome coronavirus (MERS-CoV) in 2012.

56 SARS-CoV-2 belongs to the family *Coronaviridae*, a large family of single-stranded positive-sense  
57 RNA ((+)RNA) viruses. The first two-thirds of the genome typically codes for polyproteins that, once  
58 processed by proteases, produce non-structural proteins involved in viral replication [1]. The  
59 remaining third of the genome consists of four structural proteins: envelope (E), membrane (M),  
60 nucleocapsid (N), and spike (S). Coronaviruses are well known for their ability to induce high  
61 membrane plasticity in host cells, where the membrane rearrangements lead to the formation of viral  
62 replication organelles (ROs) [2–10]. As observed in SARS-CoV-1, MERS-CoV, and the closely  
63 related coronavirus murine hepatitis virus (MHV), the ROs consist of convoluted membranes (CMs)  
64 that are interconnected with double-membrane vesicles (DMVs) and appear to be continuous with the  
65 membranes that constitute the endoplasmic reticulum (ER) [2,11–17]. Elaborate studies using  
66 immuno-fluorescence and electron microscopy (EM) techniques demonstrate that DMVs contain  
67 double-stranded RNA (dsRNA) which can be used as a marker of (+)RNA virus replication  
68 [2,3,18,19]. Taken together, these findings indicate that the RO serves as the replication and  
69 transcription site in which the DMVs, may provide a zone safe from detection by the innate immune  
70 sensors and degradation by RNA degradation machinery in the host cell [20,21].

71 The formation of DMVs has been shown to be facilitated by coronaviral non-structural proteins (nsps)  
72 [22]. Co-expression of three virally encoded transmembrane proteins, namely nsp3, nsp4, and nsp6,  
73 has been found to be sufficient for the production of DMVs in SARS-CoV-1 and MERS-CoV where  
74 the interactions of nsp3 and nsp4 result in the pairing and curving of membranes, and nsp6 contributes  
75 to the production of vesicles [9,10,23]. A recent publication, using cryo-electron tomography (cryo-  
76 ET), shows DMVs of SARS-CoV-2 and MHV in a native host cellular environment containing pore

77 complexes that were not found in previous studies using conventional EM methods [18]. Additionally,  
78 the publications by Wolff *et al.* 2020 [24] and Klein *et al.* 2020 [17] demonstrate the presence of N-  
79 protein in these DMVs.

80 The subcellular localization of the viral proteins and virus particles is based on infections in cultured  
81 cells. In patient material, viral proteins have been localized at a cellular level in various organs of  
82 COVID-19 patients [25], including human kidney [26], and in lungs of cynomolgus macaques [27].  
83 These studies used light microscopy to find regions of interest, and some of the studies subsequently  
84 used EM to find virus particles. One of the hurdles to overcome is the correct identification of viral  
85 particles in patient material such as lung [12,28–32], kidney [33–39] and other organs reviewed in [6].  
86 Recent publications show data on the morphology and size of isolated SARS-CoV-2 particles [40–43]  
87 and virus particles in Vero E6 cells [17] with the use of conventional EM and cryo-EM, although this  
88 data alone is not always sufficient to recognize viral proteins or virus particles. Bullock *et al.* proposed  
89 a set of eight rules for the correct identification of coronaviruses [6]. Following these rules, a closer  
90 inspection of 27 articles where supposed SARS-CoV-2 particles in patient-derived samples have been  
91 found, revealed that according to Bullock and Miller, only four articles correctly identified virus  
92 [6,44–47]. The most common misinterpretations were clathrin-coated vesicles as single SARS-CoV-2  
93 particles and endosome-derived multi-vesicular bodies (MVBs) as ROs [6,47].

94 To assist in this identification conundrum, labelling of antibodies directed against specific viral  
95 proteins can be of use. In this article, we provide the first insights into the localizations of both  
96 structural and non-structural proteins in SARS-CoV-2-infected Vero cells and compare this with  
97 identically processed patient samples retrieved during the first wave of SARS-CoV-2 infections using  
98 immuno-gold labelling and CLEM.

99

100

101

## 102 **Results**

### 103 **Immuno-Electron Microscopy on SARS-CoV-2-infected Vero**

#### 104 **Cells**

105 Since the outbreak of COVID-19, the identification of virus particles using EM in lung has been a  
106 heavily debated subject [6,48,49]. Based on the morphology, it is, especially in postmortem material,  
107 difficult to discriminate single virus particles from clathrin-coated vesicles, and MVBs have been  
108 interpreted as clusters of virus particles. Therefore, we decided to employ immuno-gold labelling,  
109 which can be used to decorate (viral) proteins specifically with 10- or 15-nm gold particles to  
110 distinguish them from cell organelles. This way, virus particles with M-, N-, or S-protein and the  
111 replication complexes with non-structural proteins can be identified by the gold attached to the  
112 specific antibodies. To validate whether the antibodies used for recognition of the proteins in FM [50]  
113 can be used on patient materials fixed with an extended fixation protocol, we first tested these  
114 antibodies on SARS-CoV-2-infected Vero cells. The antibodies were used on uninfected and 24-hour  
115 infected Vero cells fixed for 1, 3, and 14 days as we have fixed patient material in a similar manner.  
116 Different antibodies against viral proteins were tested (see Materials and Methods), and successful  
117 labelling and their subcellular localizations are described.

#### 118 **Characterization of virus particles with N-protein**

119 Immuno-gold labelling of SARS-CoV-1 structural proteins using a mouse anti-SARS-CoV-1-N (46-4)  
120 antibody demonstrated that the nucleocapsid protein (N-protein or N) is detected in the cytosol and on  
121 virus particles in several subcellular structures (Figs 1, S1) of infected cells. The N-protein can be  
122 specifically detected, as no labelling was detected on uninfected cells. Therefore, all membrane  
123 enclosed spherical structures ranging in size from 60 to 120 nm in diameter and with an electron-dense  
124 core (e-dense, black) [6,41], are annotated here as virus particles. Note that in cells and tissues stained  
125 with osmium and embedded in resin, membranes appear e-dense, whereas using the immuno-EM

126 method on cryo-sections, membranes appear electron-lucent (e-lucent, white) [51]. This is due to the  
127 fact that with the immuno-EM method, membranes are not stained, but only surrounding proteins in  
128 the cytosol are stained with uranyl acetate. In 24-hour infected Vero cells, small clusters of N-protein  
129 can be detected in proximity to double membrane structures, bending around the N-protein cluster  
130 similar to that in the cryo-EM sections (Fig S1), [18]. Coronaviruses are known to be a membrane  
131 enveloped viruses, mostly detected inside host membrane structures [6,52], and indeed the majority of  
132 the virus particles are surrounded by membranes. Intact viruses are identified close to the Golgi (Fig  
133 S2), inside multi-virus bodies (MViB) (Fig S3), inside open e-lucent structures (Fig S4), and in the  
134 core of double membrane spherules (DMS) [3,17] (Figs 1A, 1B). In DMSs, virus particles are  
135 spherical, but in the other compartments, both spherical and oval shaped virus particles are visible.  
136 The size of the virus particles are measured inside MViBs, DMS and intracytoplasmic and are  
137 categorized as spherical or oval-shaped. All particles are measured at the longest axis of N-protein-  
138 positive particles that have a clear membrane and e-dense core present. The average size between the  
139 spherical and oval-shaped virus is slightly different, but not statistically significant. Inside MViBs,  
140 spherical particles are  $87 \text{ nm} \pm 17 \text{ nm}$  versus  $109 \pm 26 \text{ nm}$  for the oval-shaped particles (Table 1).  
141 Also, no difference in size is measured at different subcellular locations. Different EM techniques  
142 result in slightly different sizes, being  $97 \pm 12 \text{ nm}$  for oval-shaped cryo-EM fixed extracellular SARS-  
143 CoV-2 [43] or  $99 \text{ nm}$  in resin-embedded spherical virus [41]. Thus, in 24-hour infected Vero cells N-  
144 protein-positive virus particles can be detected as spherical 87-nm or 109-nm oval-shaped membrane  
145 structures with an e-dense core, present close to Golgi, in DMS, or in multi-vesicular structures.

## 146 **Classification of virus-containing compartments**

147 As the presence of SARS-CoV-2 in multi-vesicular structures in lung is heavily debated [6,48], we  
148 studied the presence of lysosomal markers like CD63 in the multi-virus bodies (Fig S3). The Vero cell  
149 line is a kidney epithelial cell line from African green monkey, but antibodies against human CD63, a  
150 glycosylated transmembrane protein containing a putative lysosomal-targeting/internalisation motif,  
151 can be detected in multi-lamellar bodies (MLB) which are lysosomal compartments. Only some CD63  
152 label is detected in the multi-vesicular bodies (Fig S3F). Therefore, we propose that the compartments

153 in which the viral N-protein is detected, is not a true lysosome, but rather a multi-virus body. More  
154 elaborate studies on different stages of infection and blocking lysosomal acidification combined with  
155 immuno-EM have to be performed to determine the role of these MViBs during viral replication.

156 CD63 is also detected on early endosomes but not present on the majority of the e-lucent structures  
157 detected in clusters in SARS-CoV-2 infected cells (Fig S4). These structures seem to be induced by  
158 the virus infection, as uninfected cells contain larger lipid droplets but not the clustered e-lucent  
159 structures of 327 nm +/- 130 nm. High magnification analyses reveal that the e-lucent compartments  
160 appear to be filled with lipid like structures (Figs 1, S4F, S4H), much like we previously described for  
161 *Mycobacterium tuberculosis* infected cells [53]. Therefore, Nile red staining was performed on both  
162 uninfected and SARS-CoV-2 infected Vero cells, and a clear increase in Nile red signal is observed in  
163 infected cells (Fig 2). Indeed, others already demonstrated that lipid accumulation occurs after SARS-  
164 CoV-2 infection in Vero cells [54,55]. To prove that the e-lucent compartments detected with EM are  
165 Nile red positive and thus lipid-containing compartments, both FM and EM were performed on the  
166 same section and combined in a CLEM image (Fig 2C). These CLEM images demonstrate that at least  
167 a part of the e-lucent compartments are lipid filled. The structure of these compartments is not  
168 identical to lipid droplets (LD), so we used an antibody specific for perilipin-2, which is known to  
169 localize in LD [56] to determine if the SARS-CoV-2 induced lipid filled compartments are in fact lipid  
170 droplets. Immuno-gold labelling is present on typical LD in uninfected Vero cells but not on the lipid  
171 filled compartments detected in SARS-CoV-2 infected cells (Figs 2F and 2G). Based on the absence  
172 of both the lysosomal marker CD63 and LD marker perilipin-2, these e-lucent structures are not  
173 lysosomes, nor LD but rather novel lipid-filled compartments induced by SARS-CoV-2 infection.

### 174 **Localisation of M-protein and non-structural proteins nsp4 and nsp13**

175 The localisation of different viral proteins in cultured cells can be used to understand the pathology  
176 and replication of SARS-CoV-2 in lung tissue of COVID-19 patients. In infected Vero cells, the same  
177 procedures as for N-protein were applied to detect nsp3, but immuno-gold label is very limited, and  
178 thus, we conclude that this antibody does still recognize its substrate after 14 days of glutaraldehyde-



179 paraformaldehyde fixation (Table 2). The non-structural proteins nsp4 and nsp13 are detected on  
180 vesicles located nearby and attached to the Golgi stacks (Fig S2). The signal of nsp13 is limited to a  
181 few gold particles per Golgi stack, and nsp4 is more distinct, but also has some background on  
182 mitochondria (Fig S4G). The M-protein abundantly labels Golgi stacks and vesicles around the Golgi.  
183 Interestingly, nsp4, nsp13, and M are also detected on MViBs (Fig S3) and at e-lucent lipid filled  
184 compartments, while uninfected cells are unlabelled (Figs 1, S4). These structures resemble double  
185 membrane vesicles (DMVs) or single membrane vesicles described for MHV, SARS-CoV-1, SARS-  
186 CoV-2, and MERS-CoV infected cells [3,5,16–18,23,50]. Single-membrane vesicles are proposed to  
187 be derived from the ER-to-Golgi intermediate compartment [57], and play a role in the secretion of  
188 virus to be released into extracellular space. With immuno-EM labelling only on some cellular  
189 compartments, a double membrane is detected (Fig S4H, blue arrows), which could be explained by  
190 the EM-technique used. Rather than performing high pressure fixation and freeze substitution [3] or  
191 cryo-EM [17,18], we used conventional fixation to be able to compare Vero cells with lung tissues of  
192 COVID-19 patients. It is possible that the double membranes are lost during fixation for immuno-EM,  
193 as Snijder et al already demonstrated in 2006 [16]. Another limitation of the immuno-EM is that no  
194 clear spike proteins are detected on extracellular virus particles (Fig 3), though conventional sample  
195 preparation using osmium staining and embedding does show spikes [11,41] as does cryo-EM [17,18].  
196 Extracellular virus particles are immuno-labelled for both N- and M-protein. Interestingly, the  
197 majority of the extracellular virus particles are not spherical, but rather oval-shaped. The subcellular  
198 localisation of N-, M-protein and nsps in infected Vero cells is summarized in Table 2, and translation  
199 of this knowledge to patient material could be essential for understanding COVID-19 pathogenesis in  
200 patients. As immuno-localisation with the antibodies against N-, M-protein, and nsp4, are specific and  
201 survive glutaraldehyde fixation, these antibodies can be used for analysis of lung tissues.

## 202 **Immuno-EM on lung of COVID-19 patients**

203 In lung of COVID-19 patients, we searched for the presence of virus and replication organelles using  
204 antibodies selected on infected Vero cells. Material of 7 COVID-19 patients from a prospective

205 autopsy cohort study performed at Amsterdam University Medical Centers (UMC) [25] were included.  
206 With informed consent from relatives, full body autopsies were performed, and lung material was  
207 fixed for EM analysis. Materials were fixed for 1, 3 or 14 days. From those 7 patients, the lung tissues  
208 of 2 were too damaged to use for EM due to a postmortem delay. From our previous light microscopy  
209 analysis [25], we learned that only in a part of the lung tissue of a COVID-19 patient N-protein can be  
210 detected, and virus particles are difficult to find. Thus, in order to find the infected region of interest  
211 (ROI), we first performed fluorescence microscopy on sections of tissues processed for EM, so that  
212 when we identified a ROI containing viral proteins, EM could be performed (approached as in van  
213 Leeuwen et al., 2018). Semi-thick 0,3- $\mu$ m slices were incubated with antibodies against SARS-CoV-1  
214 nsp3, nsp4, nsp13, and structural proteins N-, M-, and S-protein. We focused on areas near small  
215 blood vessels and alveolar walls, as our previous LM analysis revealed infected cells present along the  
216 alveolar walls. These cells were identified to be pneumocytes, stromal cells in the septa, endothelial  
217 cells in the septal capillaries, and alveolar macrophages [25]. Fluorescence microscopy showed that  
218 the N-protein (Fig 4) and nsp4 (Fig 5) could be detected. Noteworthy is the higher background for the  
219 M antibody and the relatively low labelling for nsp3 and nsp13 (Table 3).

220 Thus, in lung tissue from COVID-19 patients, an ROI was selected by FM using the N-protein  
221 antibody. In one patient (patient 64), relatively large clusters of N-protein were detected (Fig 4A)  
222 often in a perinuclear region. As in Vero cells (Fig 2), an increase in lipid accumulation, was observed  
223 (Figs 4B, 4C). Nile red staining was combined with N-protein labelling, and N-protein and lipid  
224 accumulations, localize in the same general areas but did not co-localize at the same subcellular  
225 localisation. Control lung material processed identically to COVID-19 patient material and tested for  
226 lipid accumulation demonstrated homogeneous background staining. Sections of 150 nm were  
227 analysed with both FM and EM and combined (Fig 4D). In line with our CLEM data on the Vero  
228 cells, performing CLEM on lung tissue demonstrated that lung tissue also accumulates lipid in e-  
229 lucent compartments. Then ultrathin 60-nm cryo-sections were cut, and protein A conjugated to 10-nm  
230 gold particles was used to label N-protein.

231 The ultrastructure of the lung tissue is reasonable, given the fact that this is postmortem material and  
232 that it is from a patient with COVID-19. The tissue is unlike healthy lung tissue, not ventilated, but  
233 instead filled with erythrocytes and packed with inflammatory cells infiltrating the alveolar lumen and  
234 inter-alveolar septa. It is not always possible to identify the cell type specially when the nucleus is not  
235 present in the 60-nm thin section. N-protein is detected in cells with large e-lucent compartments, with  
236 some label found in e-lucent, lipid filled compartments. Only a few spherical single membrane  
237 structures with N-protein were detected, but these can be cytosolic, and, unlike in Vero cells,  
238 surrounded by membrane (Fig 4 inset). These might be virus-like particles, but due to the low labelling  
239 (1 gold particle), the on average larger diameter (110 nm), and an atypical localisation in the cytosol,  
240 over-interpretation is possible. Nonetheless, large clusters of viruses are not detected. Besides the  
241 limited labelling on small round vesicles, N-protein is also present on membranous structures close to  
242 e-lucent compartments (Figs 4F, S5). These structures are not present in all patients; from the 7  
243 patients investigated, 2 had clusters of proteins detectable with the SARS-CoV-1 anti N-protein. In  
244 patient 64 (patient description in Schurink et al., 2020), relatively large N-protein clusters at the e-  
245 lucent compartments were detected (Figs 4F, S5A-D), and smaller clusters are detected in patient 58,  
246 albeit at a similar location [on membrane clusters near the e-lucent compartments (Figs S5E, S5F)].

247 Using FM, nsp4 was identified in the same ROI of lung tissue used for detection of N-protein (Fig 5).  
248 Cells positive for nsp4 are present in various tissue compartments. Although background labelling is  
249 detected, some cells are brightly positive. Immuno-EM demonstrates nsp4 on e-lucent compartments,  
250 which appear filled with lipid like structures. A small amount of label is detected on mitochondria  
251 which should be regarded as background labelling, as this is also present on uninfected Vero cells (Fig  
252 S4G). The summary of subcellular viral protein localisation in lung is presented in Table 3 and,  
253 compared to the quantity of labelling in Vero cells, less labelling is detected in only limited  
254 compartments. The lipid filled compartments, however, are positive for nsp4, and N-protein is  
255 accumulated close to these compartments. Like in Vero cells, lysosomal marker CD63 is absent from  
256 these compartments and thus the lipid filled compartments in lung are non-lysosomal. To our

257 knowledge, these lipid filled compartments, containing viral proteins nsp4 and N-protein, have not  
258 been identified before and need to be further characterized.

259

## 260 Discussion

261 Since the outbreak commenced, the identification of corona viruses in lung by EM has been debated,  
262 and several articles had to be revised [47,59,60]. Experienced Electron Microscopists [6] have  
263 summarized these studies and suggest using one of 3 strategies: 1) visualisation of viral  
264 morphogenesis, 2) immuno-EM or *in situ* hybridization, or 3) visualization of particles *in situ* in tissue  
265 combined with biochemical evidence of viral presence. We chose immuno-EM with gold labelling  
266 using already validated antibodies raised against SARS-CoV-1 [50]. Immuno-EM on Vero cells  
267 identified the monoclonal anti-SARS-CoV-1-N 46-4 to be the best for the detection of nucleocapsid  
268 N-protein. Virus particles were detected in the process of development as denoted by clusters of  
269 cytosolic N-protein surrounded by double membranes (Figs 1, S1). Spherical and/or oval virus  
270 particles are detected in MViBs, in DMSs, and in membrane clusters in the cell. The spherical virus  
271 particles in DMSs ( $91 \text{ nm} \pm 15 \text{ nm}$ ) are slightly bigger than those in MViBs ( $87 \pm 17 \text{ nm}$ ) or in other  
272 regions of the cell ( $80 \pm 15 \text{ nm}$ ). Also, the oval-shaped virus particles are larger ( $109 \pm 26$  in MViBs  
273 and  $112 \pm 30 \text{ nm}$  for intracytoplasmic) than the spherical ones albeit, these variances are not  
274 statistically different. It should be noted that in immuno-EM and at 24 hours of infection, 20 % of the  
275 virus particles are scored as oval. The functional difference between spherical versus oval-shaped  
276 virus particles still has to be discovered but others have demonstrated that the oval or ellipsoidal-  
277 shaped virus particles contain more complexes of RNA and N-protein [43].

278 In lung of patients who had a fatal COVID-19 infection, virus-like particles are rarely detected even  
279 though the N-protein is detected in close proximity of the viral induced lipid filled compartments. In  
280 Vero cells however, N-protein is detected inside virus particles. It is possible that the difference is  
281 caused by incomplete fixation of lung or that ultrastructure is deteriorated in postmortem material. The

282 overall ultrastructure of the tissue, however, is acceptable (Figs 4, 5), because the postmortem time  
283 before lung tissue was fixed within a few hours, during the first wave of COVID-19 infections in the  
284 Netherlands. Finally, it is important to note that the magnification of EM makes finding 90-nm sized  
285 virus particles in a tissue block of 1x1 mm<sup>2</sup>, extremely difficult. Still, some studies have detected an  
286 occasional cell filled with virus-like particles [44–47].

287 Double membrane vesicles (DMVs), have been described in several EM studies [2,3,5,15–18] but are  
288 not so obvious in our immuno-EM images; only a few double membranes were identified surrounding  
289 e-lucent compartments (Fig S4, blue arrows), possible due to fixation limitations, as shown before by  
290 Snijder *et al.*, 2006 [16]. As double membranes were not recognizable, DMVs were not annotated in  
291 this study, and thus, it remains unclear if the DMVs detected in other studies are lipid filled.

292 Interestingly, our CLEM data (Figs 2 and 4) demonstrated that only part of the e-lucent compartments  
293 are lipid-filled. This could be due to the fact that only a subclass of the compartments are lipid filled,  
294 or could have a technical explanation. Lipids are notoriously difficult to fix with glutaraldehyde and  
295 paraformaldehyde alone [61], and thus part of the compartments might have lost the lipid content.

296 High resolution EM studies on cryo-preserved cells suggest DMVs to be filled with viral RNA with  
297 LD lying next to the DMVs [18]. For other viruses, lipid accumulation has been shown to be involved  
298 in viral replication [62–69] and some studies have demonstrated lipid accumulations in SARS-CoV-2-  
299 infected Vero cells [54] and also in infected human pulmonary epithelial Calu-3 cells [13]. Nardacci *et*  
300 *al.*, 2021, demonstrated that lipid accumulation is specific for SARS-CoV-2 and not for SARS-CoV-1  
301 in a comparative electron microscopy study and established an increase of LD in lungs from deceased  
302 COVID-19 patients. Based on our immuno-EM, we propose the SARS-CoV-2 infection-induced  
303 compartments are not LDs, as they are irregular in shape and thus have a different morphology than  
304 spherical LDs. Also, based on the visible membrane, but also by the presence of transmembrane  
305 proteins nsp4 and nsp13, the lipid-filled compartments are surrounded by a bilayer, while lipid  
306 droplets are surrounded by a monolayer of phospholipids, which are perilipin-2 positive. Taken  
307 together, SARS-CoV-2 infection induces novel lipid filled compartments, different from LD or  
308 endosomes but with viral proteins nsp4 and N-protein.

309 Another virus induced structure is the already well described convoluted membranes, which was  
310 detected in Vero cells (Fig. 1B) but not in lung. In addition, multi-virus bodies were specifically  
311 detected in Vero cells and not in lung (Figs 1, S3). The MViBs are different from lysosomal MVBs,  
312 based on the fact that the MViBs are not CD63 positive and based on the size, morphology and the M-  
313 , N-protein labelling inside the virus detected within the structures. In the lung of patients with fatal  
314 COVID-19, no MViBs were detected. Recent comparison of SARS-CoV-2 infected Vero cells versus  
315 lung organoids demonstrated that the subcellular trafficking in Vero cells might be different [70]  
316 which can explain the presence of MViB in Vero and absence of these organelle in lung. Also the  
317 infections stage could be an explanation as we have analysed postmortem material and thus the last  
318 stage of the disease.

319 Remarkably, N-protein and nsp4 are detected in lung of patients in the last stage of the disease. It  
320 seems unlikely that only these 2 proteins are still produced by active replication of the virus, as no  
321 viral proteins were detected on the Golgi, but both N-protein and nsp4 could be more stable proteins  
322 and thus not degraded. The gene encoding the N-protein is conserved and stable, and the N-protein  
323 itself is both highly immunogenic and highly expressed during infection [71]. Work on patients with a  
324 SARS-CoV-1 infection demonstrated elevated levels of IgG antibodies against N-protein [72] and  
325 showed that N-protein is an antigen for T-cell responses, inducing SARS-CoV-1-specific T-cell  
326 proliferation and cytotoxic activity [73–75]. Also, in an increasing number of case studies, anti-N IgGs  
327 were detected in patients with severe COVID-19 [76] and in children, 5 out of 6 produced neutralizing  
328 IgG and IgM antibodies targeted to the N- and S-proteins of SARS-CoV-2 [77]. Interestingly, recent  
329 reports show that immune responses to the N-protein have been associated to poor clinical out-comes  
330 [78] and correlates with severity of COVID-19 [79].

331 In the current study, we detected N-protein in fatal COVID-19 infections using mouse anti-SARS-  
332 CoV-1-N 46-4 antibody, which recognizes an epitope located in the region between amino acids 50 to  
333 200 [80], which is likely the RNA binding domain. A cryo-EM study demonstrated that the C-terminal  
334 region of the N-protein, is recognized and decorated by antibodies, and thus, is a potential  
335 immunogenic interaction site [81]. Further investigations of the stability of the various nsps and

336 structural proteins of SARS-CoV-2 might explain the observed differences in localisation in lung.  
337 Still, our electron microscopy studies showed the stable presence of N-protein and nsp4 and the  
338 induction of lipid filled compartments. Also for other viruses, like the dengue virus, accumulation of  
339 capsid on LD has been described, and, interestingly, inhibition of LD formation affected dengue virus  
340 replication [64]. Already, Dias demonstrated pharmacological inhibition via a key enzyme for LD  
341 formation effected SARS-CoV2 replication cells [52] suggestion that lipid accumulation is a potential  
342 drug target.

343 In conclusion, even after a fatal COVID-19 infection, virus particles are difficult to detect in lung, but  
344 immuno-EM demonstrated that in Vero cells SARS-CoV-2 virus particles are 90-nm spherical and  
345 110-nm oval particles. Non-structural proteins nsp4 and 13 were detected in electron lucent, partly  
346 lipid-filled compartments that are induced upon infection with SARS-CoV-2 in Vero cells. In lung  
347 tissues, similar lipid-filled compartments are detected which are the sites of N-protein and nsp4  
348 accumulation. We speculate that lipid-filled viral protein-containing compartments play an important  
349 role in the secondary effects of the disease. The uncontrolled immune responses causing the  
350 devastating damage of COVID-19 might be responding to either the proteins or even lipids  
351 accumulating in these novel subcellular compartments and thus provide new therapeutic strategies.

## 352 **Materials and Methods**

### 353 **EM Infection and fixation of Cultured Vero Cells**

354 Vero E6 were seeded ( $2.5 \times 10^6$  cells/T75 flask) one day before infection in MEM/25mM HEPES/2%  
355 fetal calf serum with penicillin and streptomycin. Cells ( $\sim 5 \times 10^6$  cells/T75) were infected with  
356 MOI=0.2 by adding the virus (nCoV-2019/Melb-1, ( $4.3 \times 10^6$  pfu/ml) to each T75 flask. Incubation was  
357 performed at 37°C for 24 hours. Then cells with and, as a control without virus, were fixed in 1 part  
358 medium plus 1 part 6% PFA + 0,4% GA in 0,4M PHEM buffer (240mM Pipes, 100mM HEPES, 8mM  
359 MgCl<sub>2</sub> and 40mM EGTA at pH 6.9). After 1, 3 and 14 days of fixation samples were transferred to  
360 storage buffer (0,2M PHEM with 0,5% PFA).



361

## 362 **Collection and initial fixation of tissue from COVID-19 patients**

363 Autopsies were performed at Amsterdam University Medical Centers (UMC), at the VU Medical  
364 Center, and the Academic Medical Center, the Netherlands, according to the declaration of Helsinki.  
365 For this EM study, 7 patients with clinically confirmed COVID-19 for whom autopsy was requested,  
366 were included (Table 4). Ethical approval was granted by the institutional review board of Amsterdam  
367 UMC (METC 2020.167). As described by Schurink et al., 2020 COVID-19 was confirmed by  
368 quantitative real-time RT-PCR, and informed consent was obtained from the decedents' next of kin.  
369 During autopsy, lungs for conventional EM were fixed in Karnovski fixative with 4% PFA with 1%  
370 GA in 0,1 M sodium cacodylate buffer. To avoid safety problems, samples were fixed for 14 days and  
371 transferred to storage buffer or embedded in gelatin and snap frozen.

## 372 **Embedding and sectioning**

373 After fixation, cells and tissue were washed 3 times with phosphate buffered saline (PBS) + 0.02M  
374 glycine (Merck, K27662101) to remove fixative. Cells were pelleted by centrifugation at 980 xg for 3  
375 minutes. Supernatant was removed, and cells were directly embedded in 12% gelatin (Sigma, G2500-  
376 500G) in 0.1 M phosphate buffer and pelleted by centrifugation for 3 minutes at 10,950 xg and  
377 solidified on ice, and blocks of ~1 mm<sup>2</sup> were cut with a razor blade. Lung tissue was cut into blocks of  
378 1-2 mm<sup>2</sup> and imbedded in a gelatin series of 2%, 6%, and 12% gelatin in 0.1 M phosphate buffer.  
379 Blocks of cells or tissue were incubated overnight in 2.3M sucrose at 4°C (Merck, K17687153) in  
380 0.1M phosphate buffer. Then samples were snap frozen and stored in liquid nitrogen. Sectioning was  
381 performed using a diamond knife (Diatome cryo-immuno) on a Leica Ultracut UC6 cryo-  
382 ultramicrotome. Semi thin sections (150-300 nm) were made at -80°C, and ultrathin sections were  
383 made at -120°C. The sections were transferred to a formvar-coated copper grid, gold finder grid, or  
384 glass slide in a droplet of 1 part 2% methylcellulose (Sigma, M6385-250G) to 1 part 2.3M sucrose.  
385 Sections were stored at 4°C until labelling.



## 386 **Immuno-fluorescence labelling**

387 Semi-thin cryo-sections were transferred to gold finder grids for EM or to glass slides for light  
388 microscopy (LM) and washed with PBS + 0.02M glycine. Then, for LM, semi-thin sections were  
389 incubated on primary antibody for 1 hour in PBS + 0.1% bovine serum albumin (Sigma, A4503-50G)  
390 and washed with PBS + 0.02M glycine. Thereafter, they were incubated with secondary antibody  
391 conjugated to Alexa 488 (Mol. Probes, A32731), and in the last 5 minutes, Nile red (Sigma, 72485)  
392 and Hoechst 33342 (Thermo Fisher, H3570) was added. After washing with PBS, a cover slip was  
393 mounted with Vectashield (Vector laboratories, H-1000). Glass slides were imaged using a Leica  
394 DM6 widefield microscope with a 100x oil objective. Images were analyzed using ImageJ FIJI.

## 395 **Immuno-gold labelling**

396 For EM, ultrathin sections were picked up and placed on 150 mesh copper grids and incubated on 2%  
397 gelatin in 0.1M phosphate buffer for 30 minutes at 37°C. Then, at room temperature, grids were  
398 washed with PBS + 0.02M glycine and blocked with 1% BSA in PBS. Grids were incubated with  
399 primary antibody in 1% BSA in PBS for 45 minutes. Then, grids were washed with PBS + 0.02M  
400 glycine. When the primary antibody was an unlabeled mouse monoclonal antibody, a secondary  
401 antibody, raised against mouse serum was used as a bridge to enhance labelling, followed by  
402 incubation with protein A conjugated with colloidal gold. In this case, background blocking was done  
403 by 0.1% BSA in PBS + 0.02M glycine, followed by incubation on rabbit anti mouse antibody (Z0259,  
404 DAKO) for 20 minutes and washed with PBS + 0.02M glycine. Again, grids were incubated in  
405 blocking solution and subsequently with protein A conjugated to 10-nm gold (Utrecht University).  
406 After washing with PBS, grids were incubated with 1% glutaraldehyde in PBS to fix the antibody-gold  
407 complex and washed 10 times for 2 minutes each with water. To contrast the samples, grids were  
408 incubated with uranyl acetate in 2% methylcellulose for 5 minutes, and the excess liquid was blotted  
409 from the grids with filter paper. Grids were imaged using a FEI Tecnai 120kV transmission electron  
410 microscope with a Veleta or Xarosa camera (EMSIS). Images were analyzed using imageJ FIJI.

## 411 Correlative light and electron microscopy

412 For CLEM, we used a method described earlier [58]. In short; grids were washed with PBS + 0.02M  
 413 glycine and incubated for 1 hour with primary antibody and again washed with PBS + 0.02M glycine.  
 414 Thereafter, grids were incubated with secondary antibody Alexa 488 and in the last 5 minutes Nile red  
 415 (Sigma, 72485) and Hoechst 33342 (Thermo Fisher, H3570) were added. After washing in PBS, the  
 416 grids were mounted in between a glass slide and a coverslip in a droplet of Vectashield. CLEM  
 417 samples were imaged on a Leica DM6 widefield microscope using a 100x oil objective. Images were  
 418 analyzed using LasX. After widefield imaging, the coverslip was removed from the glass slide by  
 419 pipetting PBS in between the coverslip and the glass slide. Vectashield was removed by washing the  
 420 grid with milliQ water at 37°C. Thereafter, the grids were contrasted and imaged as described above.  
 421 The correlation was performed using ICY eC-CLEM software.

## 422 List of materials:

| REAGENT or RESOURCE                               | SOURCE                            | IDENTIFIER                             |
|---------------------------------------------------|-----------------------------------|----------------------------------------|
| <b>Antibodies</b>                                 |                                   |                                        |
| Rabbit polyclonal anti-Nsp3                       | kind gift from Snijder laboratory | Leiden University Medical Centre; [16] |
| Rabbit polyclonal anti-Nsp4                       | kind gift from Snijder laboratory | Leiden University Medical Centre; [78] |
| Rabbit polyclonal anti-Nsp13                      | kind gift from Snijder laboratory | Leiden University Medical Centre; [16] |
| Rabbit polyclonal anti-M                          | kind gift from Snijder laboratory | Leiden University Medical Centre; [16] |
| Rabbit polyclonal anti-N anti-SARS-CoV-1-N (46-4) | kind gift from Snijder laboratory | Leiden University Medical Centre; [80] |
| Rabbit polyclonal anti-N                          | Sino Biological Inc               | Cat#40143-T62                          |
| Mouse monoclonal anti-CD63                        | Santa Cruz                        | Cat#MX<br>49.129.5;RRID11817           |
| Mouse monoclonal anti-Perilipin-2                 | Progen                            | Cat#610102;RRID00300-05                |
| Rabbit Bridging anti mouse                        | DAKO                              | Cat#Z0259;RRID20007985                 |
| Goat anti mouse alexa488                          | Life technologies                 | Car#A21242;RRID1345066                 |
| Goat anti rabbit alexa488                         | Mol. Probes, Invitrogen           | Cat#A27034;RRID2031072                 |
| Protein A conjugated to 10-nm gold                | Utrecht University                | www.cmc-utrecht.nl                     |
| <b>Chemicals</b>                                  |                                   |                                        |
| Nile red                                          | Sigma-Aldrich                     | 72485                                  |

|                                 |                                   |                          |
|---------------------------------|-----------------------------------|--------------------------|
| Hoechst 33342                   | Thermo Fisher                     | H3570                    |
| Phosphate buffered saline       | Gibco                             | 18912-014                |
| Glycine                         | Merck                             | K27662101                |
| Gelatin                         | Sigma-Aldrich                     | G2500-500G; CAS9000-70-8 |
| Methylcellulose                 | Sigma-Aldrich                     | M6385-250G; CAS9004-67-5 |
| Bovine Serum Albumin            | Sigma-Aldrich                     | A4503-50G; CAS9048-46-8  |
| Vectashield                     | Vector Laboratories               | H-1000                   |
| Uranyl acetate                  | EMS                               | 22400                    |
| Virus strains                   |                                   |                          |
| nCoV-2019/Melb-1                | kind gift from Snijder laboratory |                          |
| Experimental Models: Cell Lines |                                   |                          |
| Vero-cells                      | kind gift from Snijder laboratory |                          |

423

424

## 425 **Acknowledgements**

426 We like to thank Eric Snijder, Montse Barcena for input, discussion and providing SARS-CoV-2  
427 infected Vero cells, Sabine Krom and Jordy de Bakker for technical assistance, Sandrine Florquin for  
428 providing control lung materials; ER, MB thank Funding Amsterdam UMC Corona Research Fund;  
429 SvdN was funded by NADP and NIH grant no. AI116604.

## 430 **References**

- 431 1. Chen J, Malone B, Llewellyn E, Grasso M, Shelton PMM, Olinares PDB, et al. Structural  
432 Basis for Helicase-Polymerase Coupling in the SARS-CoV-2 Replication-Transcription  
433 Complex. *Cell*. Elsevier Inc.; 2020;182: 1560–1573.e13. doi:10.1016/j.cell.2020.07.033
- 434 2. Knoops K, Kikkert M, Van Den Worm SHE, Zevenhoven-Dobbe JC, Van Der Meer Y, Koster  
435 AJ, et al. SARS-coronavirus replication is supported by a reticulovesicular network of  
436 modified endoplasmic reticulum. *PLoS Biol*. 2008;6: 1957–1974.  
437 doi:10.1371/journal.pbio.0060226
- 438 3. Snijder EJ, Limpens RWAL, de Wilde AH, de Jong AWM, Zevenhoven-Dobbe JC, Maier HJ,  
439 et al. A unifying structural and functional model of the coronavirus replication organelle:  
440 Tracking down RNA synthesis. *bioRxiv*. 2020; doi:10.1101/2020.03.24.005298
- 441 4. Maier HJ, Hawes PC, Cottam EM, Mantell J, Verkade P, Monaghan P, et al. Infectious  
442 bronchitis virus generates spherules from zippered endoplasmic reticulum membranes. *MBio*.  
443 2013;4: 1–12. doi:10.1128/mBio.00801-13
- 444 5. Ulasli M, Verheije MH, de Haan CAM, Reggiori F. Qualitative and quantitative ultrastructural  
445 analysis of the membrane rearrangements induced by coronavirus. *Cell Microbiol*. 2010;12:  
446 844–861. doi:10.1111/j.1462-5822.2010.01437.x
- 447 6. Bullock HA, Goldsmith CS, Miller SE. Best practices for correctly identifying coronavirus by  
448 transmission electron microscopy. *Kidney Int*. Elsevier Inc; 2021;99: 824–827.  
449 doi:10.1016/j.kint.2021.01.004
- 450 7. Den Boon JA, Ahlquist P. Organelle-like membrane compartmentalization of positive-strand  
451 RNA virus replication factories. *Annu Rev Microbiol*. 2010;64: 241–256.  
452 doi:10.1146/annurev.micro.112408.134012
- 453 8. Romero-Brey I, Bartenschlager R. Endoplasmic reticulum: The favorite intracellular niche for

- 454 viral replication and assembly. *Viruses*. 2016;8: 1–26. doi:10.3390/v8060160
- 455 9. Angelini MM, Akhlaghpour M, Neuman BW, Buchmeier MJ. Severe acute respiratory  
456 syndrome coronavirus nonstructural proteins 3, 4, and 6 induce double-membrane vesicles.  
457 *MBio*. 2013;4: 1–10. doi:10.1128/mBio.00524-13
- 458 10. Angelini MM, Neuman BW, Buchmeier MJ. Untangling membrane rearrangement in the  
459 nidovirales. *DNA Cell Biol*. 2014;33: 122–127. doi:10.1089/dna.2013.2304
- 460 11. Eymieux S, Rouillé Y, Terrier O, Seron K, Blanchard E, Rosa-Calatrava M, et al.  
461 Ultrastructural modifications induced by SARS-CoV-2 in Vero cells: a kinetic analysis of viral  
462 factory formation, viral particle morphogenesis and virion release. *Cell Mol Life Sci*. Springer  
463 International Publishing; 2021;78: 3565–3576. doi:10.1007/s00018-020-03745-y
- 464 12. Yao XH, He ZC, Li TY, Zhang HR, Wang Y, Mou H, et al. Pathological evidence for residual  
465 SARS-CoV-2 in pulmonary tissues of a ready-for-discharge patient. *Cell Res*. Springer US;  
466 2020;30: 541–543. doi:10.1038/s41422-020-0318-5
- 467 13. Cortese M, Lee JY, Cerikan B, Neufeldt CJ, Oorschot VMJ, Köhrer S, et al. Integrative  
468 Imaging Reveals SARS-CoV-2-Induced Reshaping of Subcellular Morphologies. *Cell Host*  
469 *Microbe*. 2020;28: 853–866.e5. doi:10.1016/j.chom.2020.11.003
- 470 14. Hagemeyer MC, Ulasli M, Vonk AM, Reggiori F, Rottier PJM, de Haan CAM. Mobility and  
471 Interactions of Coronavirus Nonstructural Protein 4. *J Virol*. 2011;85: 4572–4577.  
472 doi:10.1128/jvi.00042-11
- 473 15. Mihelc EM, Baker SC, Lanman JK. Coronavirus infection induces progressive restructuring of  
474 the endoplasmic reticulum involving the formation and degradation of double membrane  
475 vesicles. *Virology*. Elsevier Inc.; 2021;556: 9–22. doi:10.1016/j.virol.2020.12.007
- 476 16. Snijder EJ, van der Meer Y, Zevenhoven-Dobbe J, Onderwater JJM, van der Meulen J, Koerten  
477 HK, et al. Ultrastructure and Origin of Membrane Vesicles Associated with the Severe Acute  
478 Respiratory Syndrome Coronavirus Replication Complex. *J Virol*. 2006;80: 5927–5940.

- 479           doi:10.1128/jvi.02501-05
- 480   17.   Klein S, Cortese M, Winter SL, Wachsmuth-Melm M, Neufeldt CJ, Cerikan B, et al. SARS-  
481   CoV-2 structure and replication characterized by in situ cryo-electron tomography. *Nat*  
482   *Commun. Springer US*; 2020;11: 1–10. doi:10.1038/s41467-020-19619-7
- 483   18.   Wolff G, Limpens RWAL, Zevenhoven-Dobbe JC, Laugks U, Zheng S, de Jong AWM, et al.  
484   A molecular pore spans the double membrane of the coronavirus replication organelle. *Science*  
485   (80- ). 2020;369: 1395–1398. doi:10.1126/SCIENCE.ABD3629
- 486   19.   Gosert R, Kanjanahaluethai A, Egger D, Bienz K, Baker SC. RNA Replication of Mouse  
487   Hepatitis Virus Takes Place at Double-Membrane Vesicles. *J Virol.* 2002;76: 3697–3708.  
488   doi:10.1128/jvi.76.8.3697-3708.2002
- 489   20.   Shulla A, Randall G. (+) RNA virus replication compartments: a safe home for (most) viral  
490   replication. *Curr Opin Microbiol.* 2016;32: 82–88.
- 491   21.   Scutigliani EM, Kikkert M. Interaction of the innate immune system with positive-strand RNA  
492   virus replication organelles. *Cytokine Growth Factor Rev.* 2017;37: 17–27.
- 493   22.   Siu YL, Teoh KT, Lo J, Chan CM, Kien F, Escriou N, et al. The M, E, and N Structural  
494   Proteins of the Severe Acute Respiratory Syndrome Coronavirus Are Required for Efficient  
495   Assembly, Trafficking, and Release of Virus-Like Particles. *J Virol.* 2008;82: 11318–11330.  
496   doi:10.1128/jvi.01052-08
- 497   23.   Oudshoorn D, Rijs K, Limpens RWAL, Groen K, Koster AJ, Snijder EJ, et al. Expression and  
498   cleavage of middle east respiratory syndrome coronavirus nsp3-4 polyprotein induce the  
499   formation of double-membrane vesicles that mimic those associated with coronaviral RNA  
500   replication. *MBio.* 2017;8: 1–17. doi:10.1128/mBio.01658-17
- 501   24.   Wolff G, Limpens RWAL, Zevenhoven-Dobbe JC, Laugks U, Zheng S, de Jong AWM, et al.  
502   A molecular pore spans the double membrane of the coronavirus replication organelle.  
503   *bioRxiv.* 2020;1398: 1395–1398. doi:10.1101/2020.06.25.171686

- 504 25. Schurink B, Roos E, Radonic T, Barbe E, Bouman CSC, de Boer HH, et al. Viral presence and  
505 immunopathology in patients with lethal COVID-19: a prospective autopsy cohort study. *The*  
506 *Lancet Microbe*. 2020;1: e290–e299. doi:10.1016/s2666-5247(20)30144-0
- 507 26. Ng JH, Bijol V, Sparks MA, Sise ME, Izzedine H, Jhaveri KD. Pathophysiology and Pathology  
508 of Acute Kidney Injury in Patients With COVID-19. *Adv Chronic Kidney Dis*. Elsevier Inc;  
509 2020;27: 365–376. doi:10.1053/j.ackd.2020.09.003
- 510 27. Rockx B, Kuiken T, Herfst S, Bestebroer T, Lamers MM, de Meulder D, et al. Comparative  
511 pathogenesis of COVID-19, MERS and SARS in a non-human primate model. *Science* (80- ).  
512 2020;368: 1012–1015. doi:10.1101/2020.03.17.995639
- 513 28. Pesaresi M, Pirani F, Tagliabracci A, Valsecchi M, Procopio AD, Busardò FP, et al. SARS-  
514 CoV-2 identification in lungs, heart and kidney specimens by transmission and scanning  
515 electron microscopy. *Eur Rev Med Pharmacol Sci*. 2020;24: 5186–5188.  
516 doi:10.26355/eurev\_202005\_21217
- 517 29. Grimes Z, Bryce C, Sordillo EM, Gordon RE, Reidy J, Paniz Mondolfi AE, et al. Fatal  
518 Pulmonary Thromboembolism in SARS-CoV-2-Infection. *Cardiovasc Pathol*. 2020;48:  
519 107227. doi:10.1016/j.carpath.2020.107227
- 520 30. Ackermann M, Verleden SE, Kuehnel M, Haverich A, Welte T, Laenger F, et al. Pulmonary  
521 Vascular Endothelialitis, Thrombosis, and Angiogenesis in Covid-19. *N Engl J Med*. 2020;383:  
522 120–128. doi:10.1056/nejmoa2015432
- 523 31. Borczuk AC, Salvatore SP, Seshan S V., Patel SS, Bussel JB, Mostyka M, et al. COVID-19  
524 pulmonary pathology: a multi-institutional autopsy cohort from Italy and New York City. *Mod*  
525 *Pathol*. Springer US; 2020;33: 2156–2168. doi:10.1038/s41379-020-00661-1
- 526 32. Bradley BT, Maioli H, Johnston R, Chaudhry I, Fink SL, Xu H, et al. Histopathology and  
527 ultrastructural findings of fatal COVID-19 infections in Washington State: a case series. *Lacet*.  
528 2020;396: 320–332.

- 529 33. Su H, Yang M, Wan C, Yi LX, Tang F, Zhu HY, et al. Renal histopathological analysis of 26  
530 postmortem findings of patients with COVID-19 in China. *Kidney*. 2020;98: 219–227.
- 531 34. Kissling S, Rotman S, Gerber C, Halfon M, Lamoth F, Comte D, et al. Collapsing  
532 glomerulopathy in a COVID-19 patient. *Kidney Int*. 2020;98: 228–231.  
533 doi:10.1016/j.kint.2020.04.006
- 534 35. Varga Z, Flammer AJ, Steiger P, Haberecker M, Andermatt R, Zinkernagel AS, et al.  
535 Endothelial cell infection and endotheliitis in COVID-19. *Lancet*. Elsevier Ltd; 2020;395:  
536 1417–1418. doi:10.1016/S0140-6736(20)30937-5
- 537 36. Farkash EA, Wilson AM, Jentzen JM. Ultrastructural evidence for direct renal infection with  
538 sars-cov-2. *J Am Soc Nephrol*. 2020;31: 1683–1687. doi:10.1681/ASN.2020040432
- 539 37. Abbate M, Rottoli D, Gianatti A. Covid-19 attacks the kidney: Ultrastructural evidence for the  
540 presence of virus in the glomerular epithelium. *Nephron*. 2020; doi:10.1159/000508430
- 541 38. Menter T, Haslbauer JD, Nienhold R, Savic S, Hopfer H, Deigendesch N, et al. Postmortem  
542 examination of COVID-19 patients reveals diffuse alveolar damage with severe capillary  
543 congestion and variegated findings in lungs and other organs suggesting vascular dysfunction.  
544 *Histopathology*. 2020;77: 198–209. doi:10.1111/his.14134
- 545 39. Werion A, Belkhir L, Perrot M, Schmit G, Aydin S, Chen Z, et al. SARS-CoV-2 causes a  
546 specific dysfunction of the kidney proximal tubule. *Kidney Int*. 2020;98: 1296–1307.
- 547 40. Ke Z, Oton J, Qu K, Cortese M, Zila V, McKeane L, et al. Structures and distributions of  
548 SARS-CoV-2 spike proteins on intact virions. *Nature*. Springer US; 2020;588: 498–502.  
549 doi:10.1038/s41586-020-2665-2
- 550 41. Laue M, Kauter A, Hoffmann T, Möller L, Michel J, Nitsche A. Morphometry of SARS- CoV  
551 and SARS- CoV- 2 particles in ultrathin plastic sections of infected Vero cell cultures  
552 Michael. *Sci Rep*. 2021;11.



- 553 42. Turoňová B, Sikora M, Schürmann C, Hagen WJH, Welsch S, Blanc FEC, et al. In situ  
554 structural analysis of SARS-CoV-2 spike reveals flexibility mediated by three hinges. *bioRxiv*.  
555 2020;208: 203–208. doi:10.1101/2020.06.26.173476
- 556 43. Yao H, Song Y, Chen Y, Wu N, Xu J, Sun C, et al. Molecular Architecture of the SARS-CoV-  
557 2 Virus. *Cell*. Elsevier Inc.; 2020;183: 730–738.e13. doi:10.1016/j.cell.2020.09.018
- 558 44. Martines RB, Ritter JM, Matkovic E, Gary J, Bollweg BC, Bullock H, et al. Pathology and  
559 pathogenesis of SARS-CoV-2 associated with fatal coronavirus disease, united states. *Emerg*  
560 *Infect Dis*. 2020;26: 2005–2015. doi:10.3201/eid2609.202095
- 561 45. Carsana L, Sonzogni A, Nasr A, Rossi RS, Pellegrinelli A, Zerbi P, et al. Pulmonary post-  
562 mortem findings in a series of COVID-19 cases from northern Italy: a two-centre descriptive  
563 study. *Lancet infect dis*. 2020;20: 1135–1140.
- 564 46. Falasca L, Nardacci R, Colombo D, Lalle E, DI Caro A, Nicastrì E, et al. Postmortem Findings  
565 in Italian Patients with COVID-19: A Descriptive Full Autopsy Study of Cases with and  
566 without Comorbidities. *J Infect Dis*. 2020;222: 1807–1815. doi:10.1093/infdis/jiaa578
- 567 47. Dittmayer C, Meinhardt J, Radbruch H, Radke J, Heppner BI, Heppner FL, et al. Why  
568 misinterpretation of electron micrographs in SARS-CoV-2-infected tissue goes viral. *Lancet*.  
569 Elsevier Ltd; 2020;396: e64–e65. doi:10.1016/S0140-6736(20)32079-1
- 570 48. Goldsmith CS, Miller SE, Martines RB, Bullock HA, Zaki SR. Electron microscopy of SARS-  
571 CoV-2: a challenging task. *Lancet*. Elsevier Ltd; 2020;395: e99. doi:10.1016/S0140-  
572 6736(20)31188-0
- 573 49. Akilesh S, Nicosia RF, Alpers CE, Tretiakova M, Hsiang TY, Gale M, et al. Characterizing  
574 Viral Infection by Electron Microscopy: Lessons from the Coronavirus Disease 2019  
575 Pandemic. *Am J Pathol*. American Society for Investigative Pathology; 2021;191: 222–227.  
576 doi:10.1016/j.ajpath.2020.11.003
- 577 50. Ogando NS, Dalebout TJ, Zevenhoven-Dobbe JC, Limpens RWAL, van der Meer Y, Caly L,

- 578 et al. SARS-coronavirus-2 replication in Vero E6 cells: Replication kinetics, rapid adaptation  
579 and cytopathology. *J Gen Virol.* 2020;101: 925–940. doi:10.1099/jgv.0.001453
- 580 51. van der Wel NN, Hava D, Houben D, Fluitsma D, van Zon M, Pierson J, et al. M . tuberculosis  
581 and M . leprae Translocate from the Phagolysosome to the Cytosol in Myeloid Cells. *Cell.*  
582 2007; 1287–1298. doi:10.1016/j.cell.2007.05.059
- 583 52. Bullock HA, Goldsmith CS, Zaki SR, Martines RB, Miller SE. Difficulties in differentiating  
584 coronaviruses from subcellular structures in human tissues by electron microscopy. *Emerg*  
585 *Infect Dis.* 2021;27: 1023–1031. doi:10.3201/eid2704.204337
- 586 53. Buter J, Cheng T-Y, Ghanem M, Grootemaat AE, Raman S, Feng X, et al. Mycobacterium  
587 tuberculosis releases an antacid that remodels phagosomes. *Nat Chem Biol.* Springer US;  
588 2019;15: 889–899. doi:10.1038/s41589-019-0336-0
- 589 54. da Silva Gomes Dias S, Soares VC, Ferreira AC, Sacramento CQ, Fintelman-Rodrigues N,  
590 Temerozo JR, et al. Lipid droplets fuel SARS-CoV-2 replication and production of  
591 inflammatory mediators. *PLoS Pathog.* 2020;16: 1–19. doi:10.1371/journal.ppat.1009127
- 592 55. Nardacci R, Colavita F, Castilletti C, Lapa D, Matusali G, Meschi S, et al. Evidences for lipid  
593 involvement in SARS-CoV-2 cytopathogenesis. *Cell Death Dis.* Springer US; 2021;12.  
594 doi:10.1038/s41419-021-03527-9
- 595 56. Greenberg AS, Egan JJ, Wek SA, Garty NB, Blanchette-Mackie EJ, Londos C. Perilipin, a  
596 major hormonally regulated adipocyte-specific phosphoprotein associated with the periphery of  
597 lipid storage droplets. *J Biol Chem.* © 1991 ASBMB. Currently published by Elsevier Inc;  
598 originally published by American Society for Biochemistry and Molecular Biology.; 1991;266:  
599 11341–11346. doi:10.1016/s0021-9258(18)99168-4
- 600 57. de Haan CAM, Rottier PJM. Molecular Interactions in the Assembly of Coronaviruses. *Adv*  
601 *Virus Res.* 2005;64: 165–230. doi:10.1016/S0065-3527(05)64006-7
- 602 58. van Leeuwen LM, Boot M, Kuijl C, Picavet DI, van Stempvoort G, van der Pol SMA, et al.

- 603 Mycobacteria employ two different mechanisms to cross the blood–brain barrier. *Cell*  
604 *Microbiol.* 2018;20: 1–17. doi:10.1111/cmi.12858
- 605 59. Dolhnikoff M, Ferreira Ferranti J, de Almeida Monteiro RA, Duarte-Neto AN, Soares Gomes-  
606 Gouvêa M, Viu Degaspere N, et al. SARS-CoV-2 in cardiac tissue of a child with COVID-19-  
607 related multisystem inflammatory syndrome. *Lancet Child Adolesc Heal.* 2020;4: 790–794.  
608 doi:10.1016/S2352-4642(20)30257-1
- 609 60. Kniss DA. Alternative interpretation to the findings reported in visualization of severe acute  
610 respiratory syndrome coronavirus 2 invading the human placenta using electron microscopy.  
611 *Am J Obstet Gynecol.* Elsevier Inc.; 2020;223: 785–786. doi:10.1016/j.ajog.2020.06.016
- 612 61. Fujimoto T, Ohsaki Y, Suzuki M, Cheng J. Imaging Lipid Droplets by Electron Microscopy.  
613 *Methods in Cell Biology.* 1st ed. Elsevier Inc.; 2013. pp. 227–251. doi:10.1016/B978-0-12-  
614 408051-5.00012-7
- 615 62. Villareal VA, Rodgers MA, Costello DA, Yang PL. Targeting host lipid synthesis and  
616 metabolism to inhibit dengue and hepatitis C viruses. *Antiviral Res.* 2015;124: 110–121.  
617 doi:10.1016/j.antiviral.2015.10.013.Targeting
- 618 63. Lyn RK, Hope G, Sherratt AR, McLauchlan J, Pezacki JP. Bidirectional lipid droplet velocities  
619 are controlled by differential binding strengths of HCV core DII protein. *PLoS One.* 2013;8.  
620 doi:10.1371/journal.pone.0078065
- 621 64. Filipe A, McLauchlan J. Hepatitis C virus and lipid droplets: Finding a niche. *Trends Mol Med.*  
622 Elsevier Ltd; 2015;21: 34–42. doi:10.1016/j.molmed.2014.11.003
- 623 65. Cheung W, Gill M, Esposito A, Kaminski CF, Courousse N, Chwetzoff S, et al. Rotaviruses  
624 Associate with Cellular Lipid Droplet Components To Replicate in Viroplasms, and  
625 Compounds Disrupting or Blocking Lipid Droplets Inhibit Viroplasm Formation and Viral  
626 Replication. *J Virol.* 2010;84: 6782–6798. doi:10.1128/jvi.01757-09
- 627 66. Coffey CM, Sheh A, Kim IS, Chandran K, Nibert ML, Parker JSL. Reovirus Outer Capsid

- 628 Protein  $\mu$ 1 Induces Apoptosis and Associates with Lipid Droplets, Endoplasmic Reticulum, and  
629 Mitochondria. *J Virol.* 2006;80: 8422–8438. doi:10.1128/jvi.02601-05
- 630 67. Samsa MM, Mondotte JA, Iglesias NG, Assunção-Miranda I, Barbosa-Lima G, Da Poian AT,  
631 et al. Dengue virus capsid protein usurps lipid droplets for viral particle formation. *PLoS*  
632 *Pathog.* 2009;5. doi:10.1371/journal.ppat.1000632
- 633 68. Ilnytska O, Santiana M, Hsu N, Du W, Chen Y, Viktorova EG, et al. Enteroviruses harness the  
634 cellular endocytic machinery to remodel the host cell cholesterol landscape for effective viral  
635 replication. *Cell Host Microbe.* 2013;14: 281–293.  
636 doi:10.1016/j.chom.2013.08.002.Enteroviruses
- 637 69. Melia CE, Peddie CJ, de Jong AWM, Snijder EJ, Collinson LM, Koster AJ, et al. Origins of  
638 enterovirus replication organelles established by whole-cell electron microscopy. *MBio.*  
639 2019;10: 1–12. doi:10.1128/mBio.00951-19.
- 640 70. Beumer J, Geurts MH, Lamers MM, Puschhof J, Zhang J, Der J Van. A CRISPR / Cas9  
641 genetically engineered organoid biobank reveals essential host factors for coronaviruses.  
642 *bioRxiv.* 2021;
- 643 71. Cong Y, Ulasli M, Schepers H, Mauthe M, V'kovski P, Kriegenburg F, et al. Nucleocapsid  
644 Protein Recruitment to Replication-Transcription Complexes Plays a Crucial Role in  
645 Coronaviral Life Cycle. *J Virol.* 2020;94: 1–21. doi:10.1128/jvi.01925-19
- 646 72. Leung DTM, Tam FCH, Chun HM, Chan PKS, Cheung JLK, Niu H, et al. Antibody response  
647 of patients with Severe Acute Respiratory Syndrome (SARS) targets the viral nucleocapsid. *J*  
648 *Infect Dis.* 2004;190: 379–386. doi:10.1086/422040
- 649 73. Dutta NK, Mazumdar K, Gordy JT. The Nucleocapsid Protein of SARS–CoV-2: a Target for  
650 Vaccine Development. *J Virol.* 2020;94: 1–2. doi:10.1128/jvi.00647-20
- 651 74. Shah VK, Fimal P, Alam A, Ganguly D, Chattopadhyay S. Overview of Immune Response  
652 During SARS-CoV-2 Infection: Lessons From the Past. *Front Immunol.* 2020;11: 1–17.

653 doi:10.3389/fimmu.2020.01949

654 75. Gao W, Tamin A, Soloff A, Aiuto LD, Nwanegbo E, Robbins PD, et al. Effects of a SARS-  
655 associated coronavirus vaccine in monkeys. *Lancet*. 2003;362: 1895–1896.

656 76. To KKW, Tsang OTY, Leung WS, Tam AR, Wu TC, Lung DC, et al. Temporal profiles of  
657 viral load in posterior oropharyngeal saliva samples and serum antibody responses during  
658 infection by SARS-CoV-2: an observational cohort study. *Lancet Infect Dis*. Elsevier Ltd;  
659 2020;20: 565–574. doi:10.1016/S1473-3099(20)30196-1

660 77. Zhang Y, Xu J, Jia R, Yi C, Gu W, Liu P, et al. Protective humoral immunity in SARS-CoV-2  
661 infected pediatric patients. *Cell Mol Immunol*. Springer US; 2020;17: 768–770.  
662 doi:10.1038/s41423-020-0438-3

663 78. Atyeo C, Fischinger S, Zohar T, Slein MD, Burke J, Loos C, et al. Distinct Early Serological  
664 Signatures Track with SARS-CoV-2 Survival. *Immunity*. Elsevier Inc.; 2020;53: 524–532.e4.  
665 doi:10.1016/j.immuni.2020.07.020

666 79. Shrock E, Fujimura E, Kula T, Timms RT, Lee IH, Leng Y, et al. Viral epitope profiling of  
667 COVID-19 patients reveals cross-reactivity and correlates of severity. *Science* (80- ).  
668 2020;370. doi:10.1126/science.abd4250

669 80. Fang Y, Pekosz A, Haynes L, Nelson EA, Rowland RRR. Production and characterization of  
670 monoclonal antibodies against the nucleocapsid protein of SARS-CoV. *Adv Exp Med Biol*.  
671 2006;581: 153–156. doi:10.1007/978-0-387-33012-9\_27

672 81. Casasanta MA, Jonaid GM, Kaylor L, Luqiu WY, Solares MJ, Schroen ML, et al. Microchip-  
673 based structure determination of low-molecular weight proteins using cryo-electron  
674 microscopy. *Nanoscale*. Royal Society of Chemistry; 2021;13: 7285–7293.  
675 doi:10.1039/d1nr00388g

676 82. Moriel-Carretero M. The hypothetical role of phosphatidic acid in subverting ER membranes  
677 during SARS-CoV infection. *Traffic*. 2020;21: 545–551. doi:10.1111/tra.12738

- 678 83. Van Hemert MJ, Van Den Worm SHE, Knoops K, Mommaas AM, Gorbalenya AE, Snijder EJ.  
679 SARS-coronavirus replication/transcription complexes are membrane-protected and need a  
680 host factor for activity in vitro. PLoS Pathog. 2008;4. doi:10.1371/journal.ppat.1000054

681

682

683 **Tables**

684

| Location    | MViB      |        | DMS       | Intracytoplasmic |        |
|-------------|-----------|--------|-----------|------------------|--------|
| Virus shape | spherical | oval   | spherical | spherical        | oval   |
| x in nm     | 87±17     | 109±26 | 91±15     | 80±15            | 112±30 |
| n           | 62        | 22     | 33        | 21               | 7      |

685 **Table 1. Average particle size at different subcellular locations.** Average size of virus particles in  
 686 double membrane spherules (DMS), multi-virus bodies (MViB), and intracytoplasmic was measured  
 687 and presented as average size (x) ± standard deviation and number of virus particles measured (n) in  
 688 Vero cells infected with SARS-CoV-2 for 24 hours and immuno-gold labelled for N-protein with 10-  
 689 nm gold.

690

| Location in cell culture     | N   | M   | Nsp3 | Nsp4 | Nsp13 | CD63 |
|------------------------------|-----|-----|------|------|-------|------|
| Virus particle               | +   | +   | -    | -    | -     | -    |
| Golgi                        | +/- | +   | -    | +    | +/-   | -    |
| DMS                          | +   | +/- | -    | -    | -     | -    |
| MViB                         | +   | +   | -    | +/-  | +/-   | +/-  |
| MLB                          | -   | -   | -    | -    | -     | +    |
| e-lucent compartment         | +/- | +/- | -    | +    | +/-   | -    |
| extracellular virus particle | +   | +   | -    | -    | -     | -    |

691 **Table 2. Immuno-gold labelling of viral proteins in SARS-CoV-2-infected Vero cells.** Presence of  
 692 immuno-gold labelling on virus particles, Golgi, double membrane spherule (DMS), multi-virus  
 693 bodies (MViB), multi-lamellar bodies (MLB), e-lucent compartments and extracellular virus particles  
 694 in Vero cells infected with SARS-CoV-2 for 24 hours. Annotations: + present; - absent; +/- present but  
 695 less prominent.

696

| Location in lung             | N   | M   | Nsp3 | Nsp4 | Nsp13 | CD63 |
|------------------------------|-----|-----|------|------|-------|------|
| Virus particle               | +/- | -   | -    | -    | -     | -    |
| Golgi                        | -   | -   | -    | -    | -     | -    |
| DMS                          | -   | -   | -    | -    | -     | -    |
| MViB                         | -   | -   | -    | -    | -     | -    |
| MLB                          | -   | -   | -    | -    | -     | +    |
| e-lucent compartment         | +/- | +/- | -    | +    | -     | -    |
| Extracellular virus particle | -   | -   | -    | -    | -     | -    |

697 **Table 3. Immuno-gold labelling of viral proteins in SARS-CoV-2 infected lung.** Presence of  
 698 immuno-gold labelling on virus particles, Golgi, double membrane spherule (DMS), multi-virus  
 699 bodies (MViB), multi-lamellar bodies (MLB), e-lucent compartments and extracellular virus particles  
 700 in patient 58 and 64 infected with SARS-CoV-2. Annotations: + present; - absent; +/- present but less  
 701 prominent.

702

| Patient    | Infection stadium                                                     | Sex | Age | COV-N | Remarks        |
|------------|-----------------------------------------------------------------------|-----|-----|-------|----------------|
| SVU 20-58  | Limited infected cells in lung, limited systemic presence (HPB tract) | F   | 72  | +     | Data presented |
| SVU 20-39  | Severe infected cells in lungs, systemic presence (GI tract)          | M   | 73  | +     |                |
| SVU 20-63  | No presence in lung, limited presence in the heart                    | M   | 74  | +     |                |
| SVU 20-64  | Limited presence in the lung, no systemic presence                    | F   | 68  | +     | Data presented |
| SVU 20-155 | -                                                                     | F   | 75  | +     |                |
| SVU 20-163 | -                                                                     | M   | 61  | +     |                |
| SVU 20-174 | -                                                                     | M   | 78  | +     |                |
| SVU 20-129 | Control non-covid                                                     | M   | 68  | -     |                |
| T18-5683   | Control non-covid                                                     | F   | 5   | -     | Data presented |
| T18-10645  | Control non-covid                                                     | F   | 15  | -     |                |



703 **Table 4. Patient description.** Information of patients from who autopsy material was taken with  
704 informed consent and fixed for electron microscopy. In this study, electron micrographs were used  
705 from patients SVU 20-58, SVU 20-64, and control T18-5683.

706

## 707 **Figure Legends**

708 **Figure 1. Subcellular localisation of viral proteins in infected Vero-cells.** Vero cells were infected  
709 with SARS-CoV-2 for 24 hours and immuno-EM labelled with antibodies against SARS-CoV-1  
710 proteins, followed by secondary antibodies conjugated to 10-nm gold particles. A) Clusters of N-  
711 protein labelling in cytosol (open arrows), and (enlarged in A') on double membrane spherules (right-  
712 most black arrow), or virus particles enclosed in a single membrane (two left-most black arrows).  
713 From the e-lucent compartment (red \*) a "virus-like" particle (as it is without N-protein labelling) is  
714 budding (white arrow). A'') enlarged area with MViB containing labelled and unlabelled virus-like  
715 particles. B) M-protein immuno-gold labelling on e-lucent compartments (gold is circled in red); in  
716 enlarged box, immuno-gold labelling on convoluted membrane structure (CM). Note virus-like  
717 particles are not labelled. C) Immuno-gold labelling of nsp4 on e-lucent compartments (circled in red)  
718 and various DMS without nsp4 labelling, also enlarged in C'. D) immuno-labelling of nsp13 on e-  
719 lucent compartments containing lipid like structures (red arrows). D') higher magnification of D.  
720 Immuno-gold decoration on e-lucent compartments is indicated by red circles; mitochondria by m,  
721 multiple virus body by MViB, convoluted membrane structure by CM, lipid like structures by red  
722 arrows, N-protein in cytosol by open arrows, N-protein labelled virus by black arrows, and black  
723 boxes indicate enlarged area.

724 **Figure 2. Lipid accumulates in e-lucent compartments more densely in infected Vero cells.**

725 Fluorescence microscopy of DNA and lipid staining with Nile red in A) the uninfected control (Con)  
726 Vero cells and B) cells infected with SARS-CoV-2 for 24 hours; C) Electron microscopy of infected  
727 cells; D) Fluorescence microscopy of the same cells, and E) Correlative light-electron microscopy  
728 (CLEM) showing lipid staining at e-lucent compartments in the electron microscope. Immuno-EM  
729 labelling for lipid droplet marker perilipin-2 in F) uninfected Vero cells and G) cells infected with  
730 SARS-CoV-2 for 24 hours. Blue color in A, B, D, and E shows the nuclei stained with Hoechst and  
731 red shows the lipids stained with Nile red. In electron micrographs, lipid like structure is denoted by

732 red arrows, virus particles by black arrows, immuno-gold labelling of perilipin-2 by red circles,  
733 mitochondria by m, and lipid droplets by LD.

734 **Figure 3. Release of virus particles from Vero cells infected with SARS-CoV-2 for 24 hr.** EM  
735 micrographs, demonstrate A) lack of immuno-gold labelling on extracellular virus particle using anti-  
736 nsp4, a non-structural protein of SARS-CoV-2 (black arrow); B) extracellular virus particles labelled  
737 with anti-N-protein, and C) anti-M-protein also labels on extracellular virus particles. Here, m  
738 represents mitochondrion, MViB multi-virus body.

739 **Figure 4. N-protein in e-lucent compartments in Lung COVID-19 patient.** Lung from control and  
740 infected patients was either sectioned semi-thin for FM (A-C) or CLEM (D) and stained with Hoechst  
741 (blue) to identify nuclei, Nile red (red) to denote lipid, or anti-N-protein (green) to show N-protein, or  
742 it was ultrathin-sectioned for EM (E and F) and immuno-gold labelled using anti N-protein followed  
743 by secondary antibody tagged with 10-nm gold particles. A) COVID-19-infected lung showing  
744 accumulations of N-protein and Nile red stained lipids. B) overview of an uninfected control lung with  
745 no N-protein or lipid accumulation. C) Overview of infected lung with lipid accumulation. Identical  
746 section analysed by CLEM of infected lung demonstrate the e-lucent compartments present by EM (D)  
747 are Nile red and N-protein labelled (D') by the overlay of the FM on the EM micrograph (D'').  
748 Immuno-gold labelling of infected lung with antibody against N-protein at low magnification (E) and  
749 magnified region from boxed area where lipid like structures (open red arrows) are visible (E') and a  
750 single virus particle with N labelling (E''), low magnification of N-protein labelling on membrane  
751 structures near the e-lucent compartments F); high magnification of F') clusters of N-protein labelling.  
752 Erythrocytes represented by e, nucleus by n, open red arrow lipid like structures, and boxed areas  
753 enlarged region.

754 **Figure 5. Non-structural protein 4 in e-lucent compartments infected lung.** Lung tissue of  
755 COVID-19 patient 58 was either sectioned semi-thin for FM with A) nuclei, stained with Hoechst  
756 (blue), nsp4 stained with Alexa (green) in nsp4 positive cells indicated by white arrows and in black  
757 and white, and erythrocytes represented by e. Separate channels of nsp4 (B) and DNA (C). Ultrathin

758 sections of infected lung immuno-gold labelled against nsp-4 and 10-nm gold particles in overview  
759 (D) and at higher magnification (E) e-lucent compartments with nsp4 labelling on membrane and lipid  
760 like structures (open red arrows) erythrocytes represented by e. F) Schematic representation of  
761 uninfected Vero cells, SARS-CoV-2 infected Vero cells and lung tissue of COVID-19 patient  
762 summarizing presence cellular organelles and subcellular localisation viral proteins. In black: host  
763 compartments, in green: viral compartments, in red: lipid like structures, CM convoluted membrane  
764 DMS: double membrane spherules, G: Golgi, LD: lipid droplet, MLB: multi-lamellar bodies, MViB:  
765 multi-virus body, LFC: lipid-filled compartment and immuno-labelling viral proteins: dark green  
766 triangle: nsp13, light green triangle: nsp4, blue circle: N-protein, yellow square: M-protein.



Figure 1

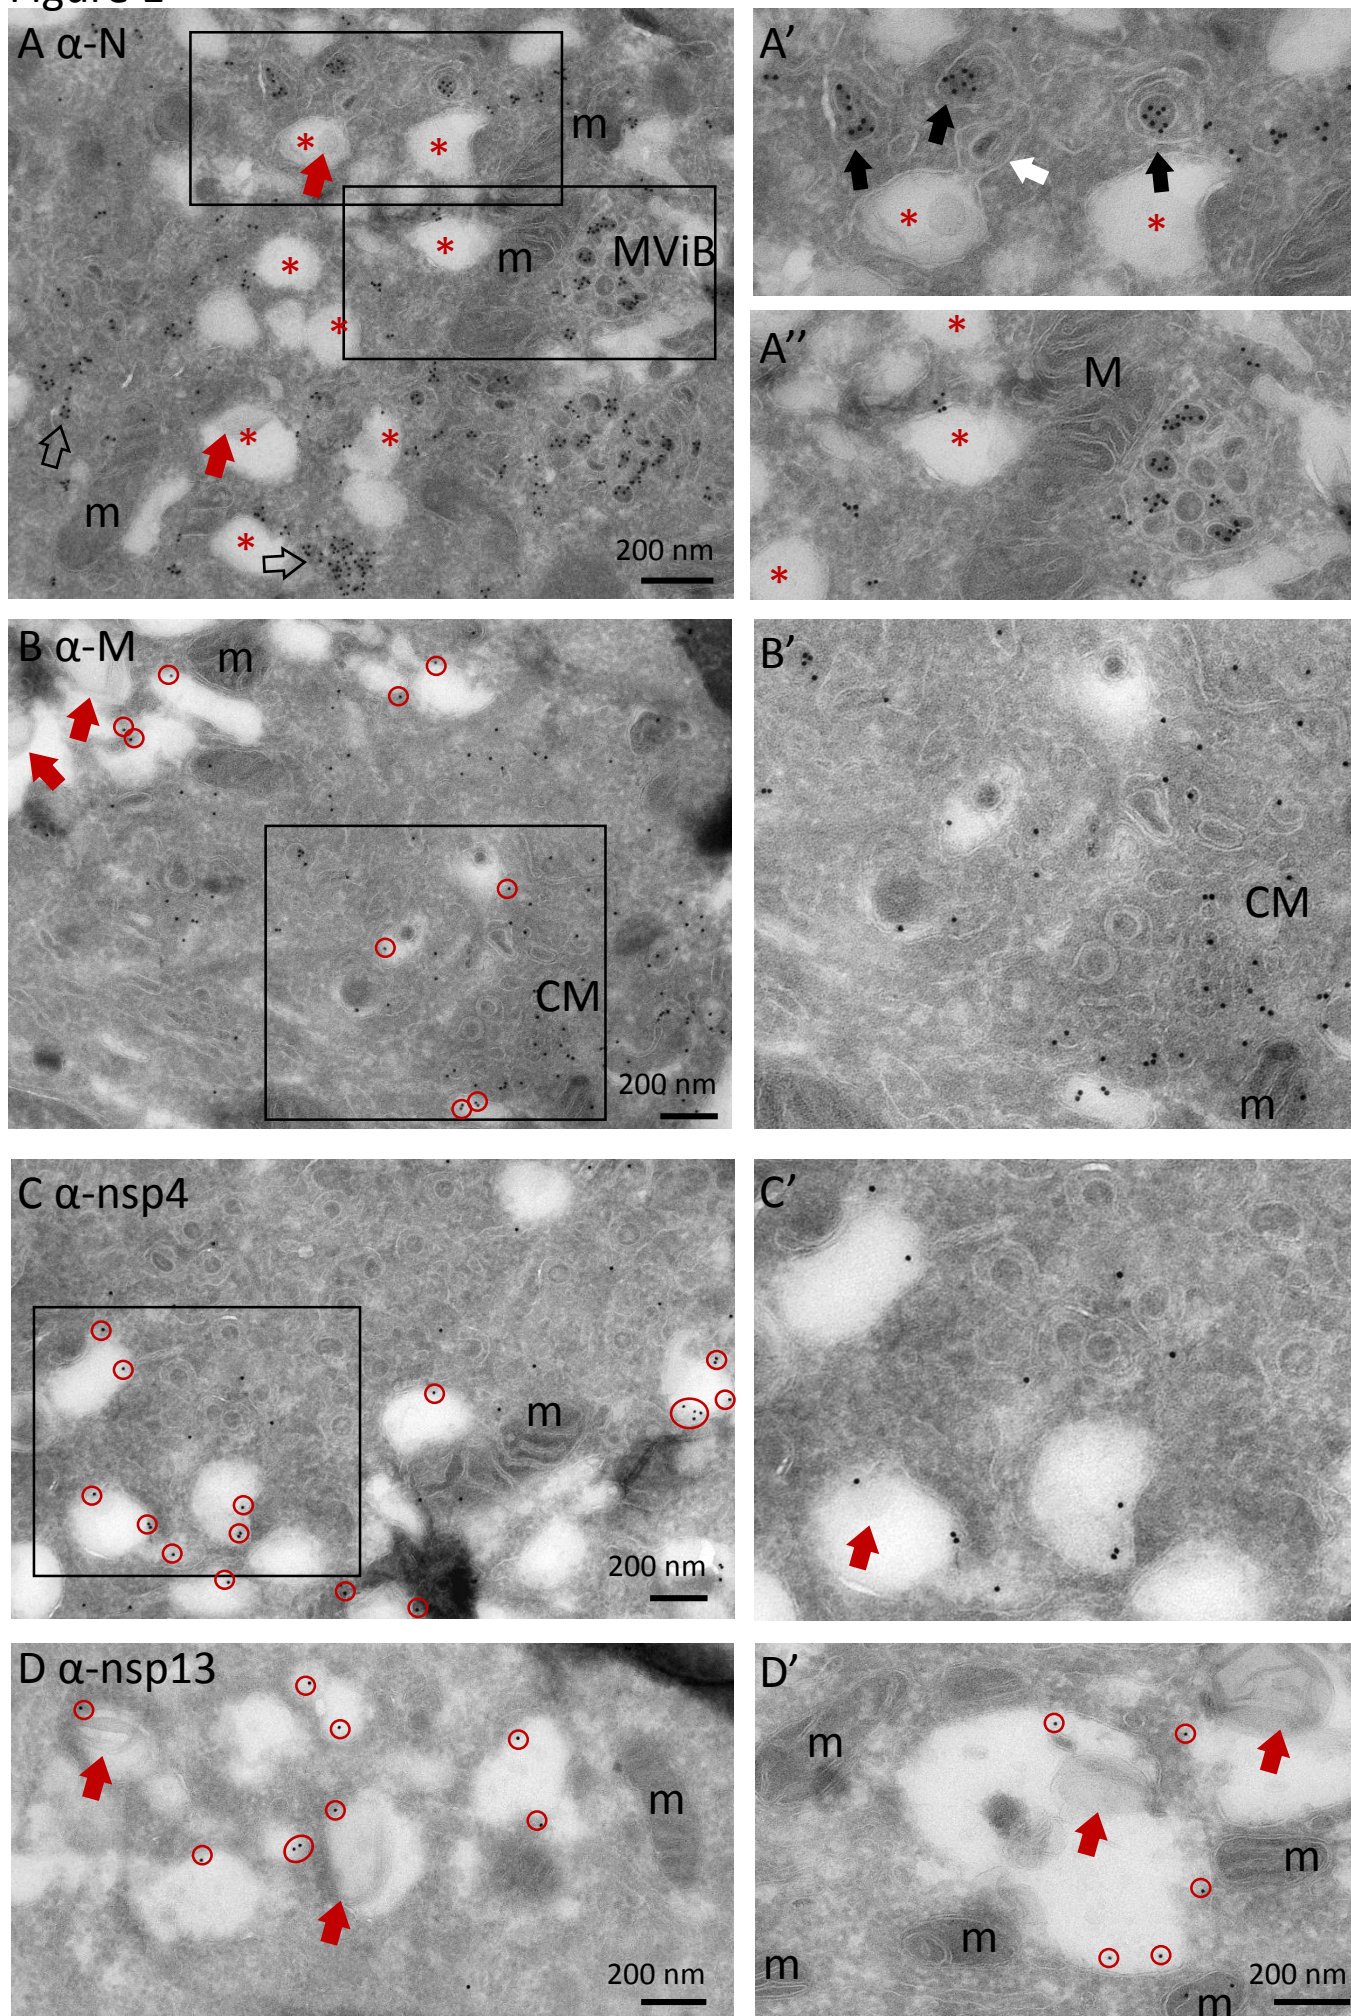



Figure 2

Con Vero: Lipid DNA

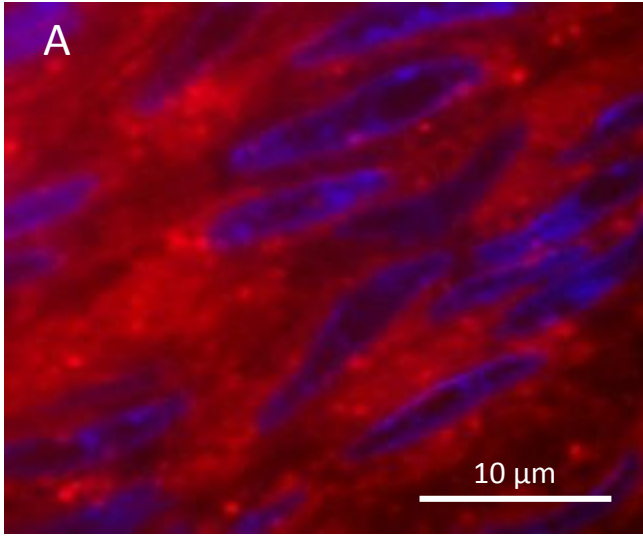

SARS-CoV-2 Vero: Lipid DNA

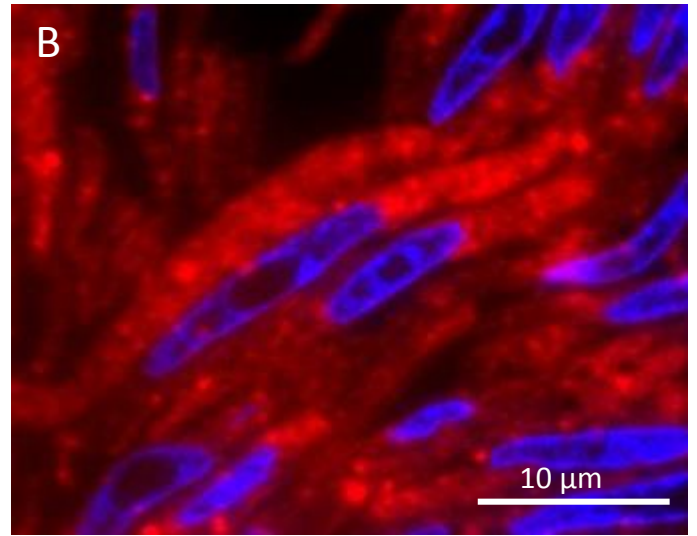

EM

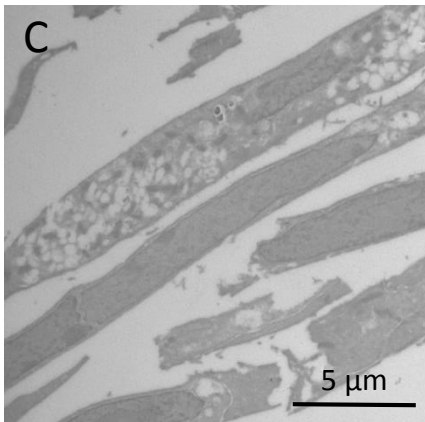

FM: Lipid DNA

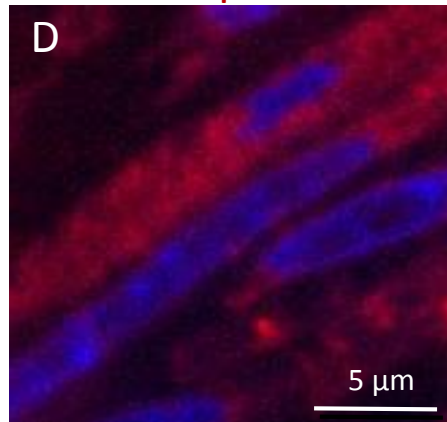

CLEM

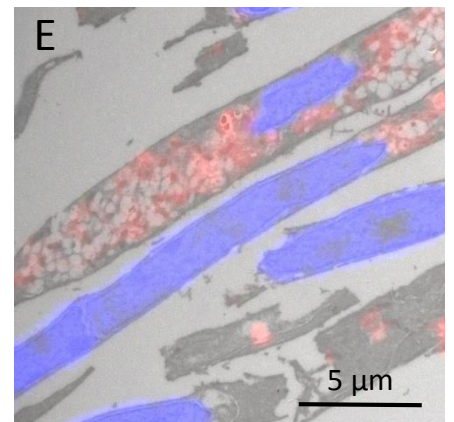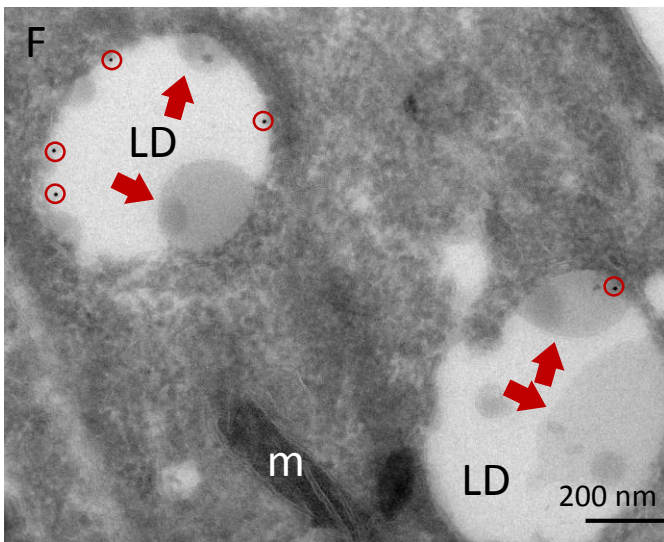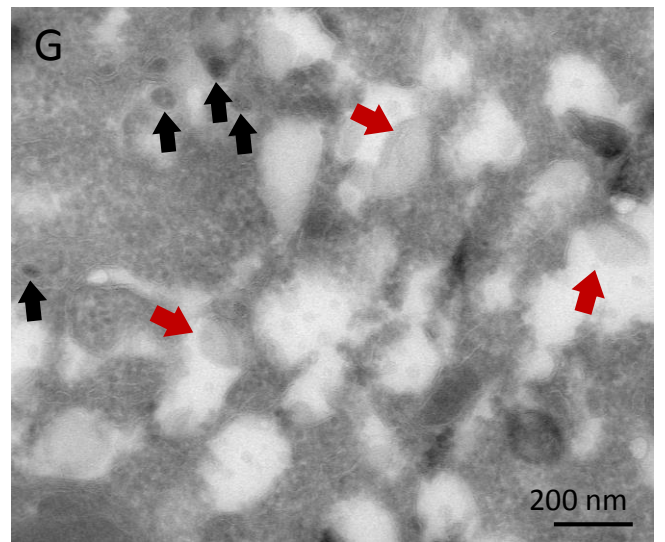

Figure 3

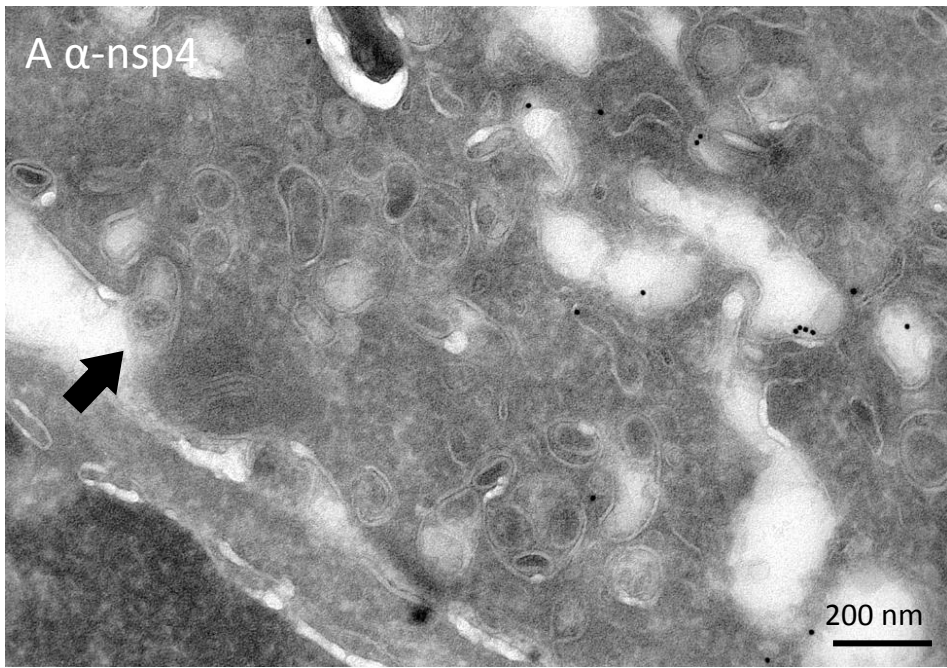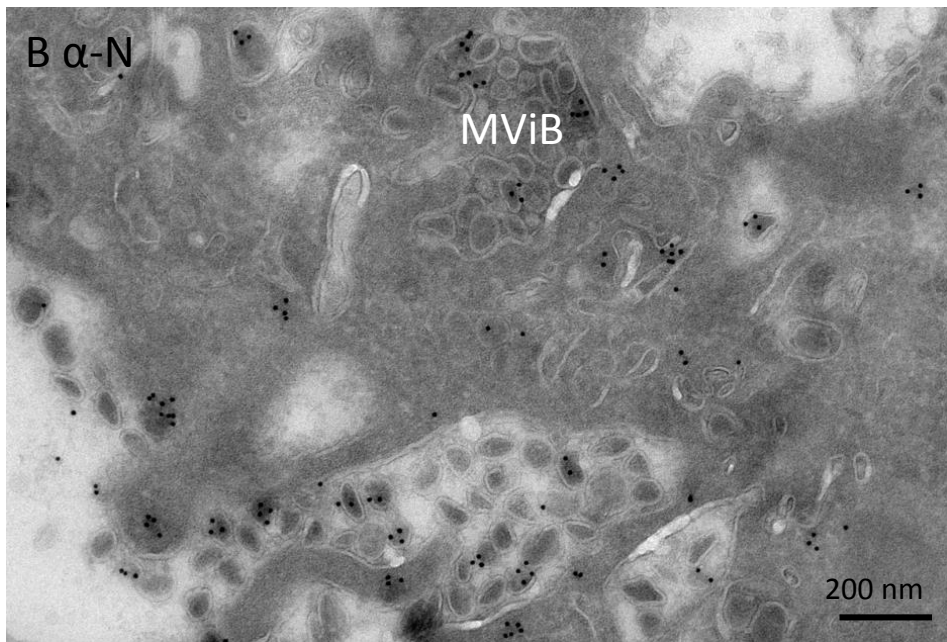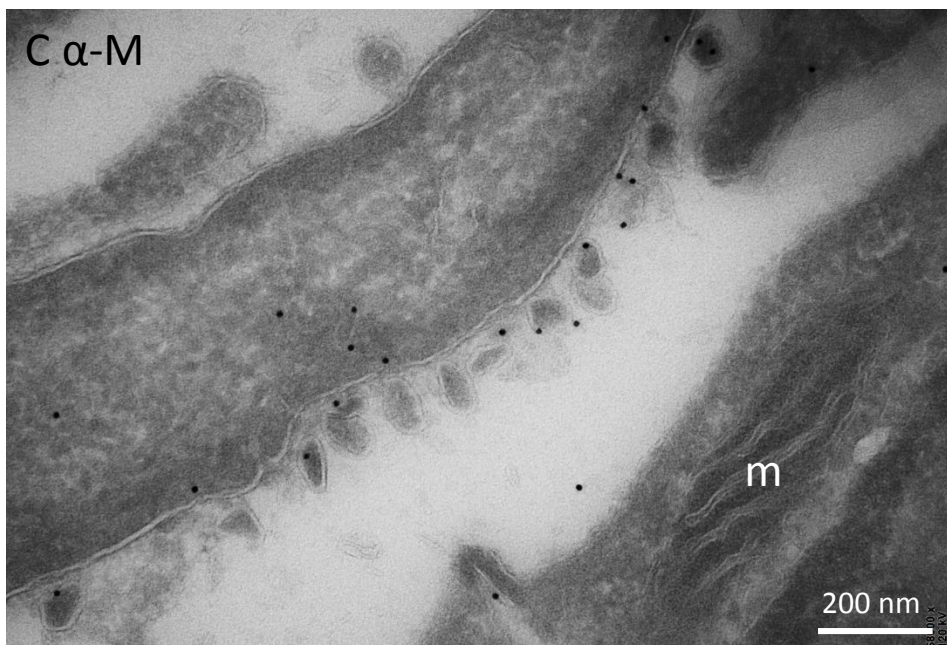



Figure 4

DNA Lipid N patient 64

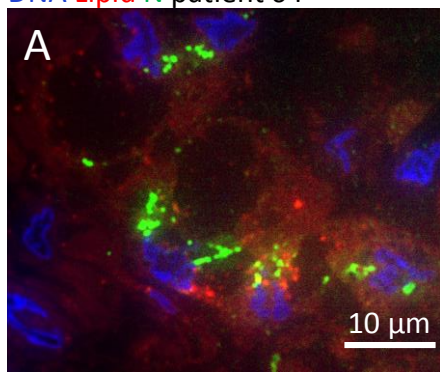

DNA Lipid Control patient

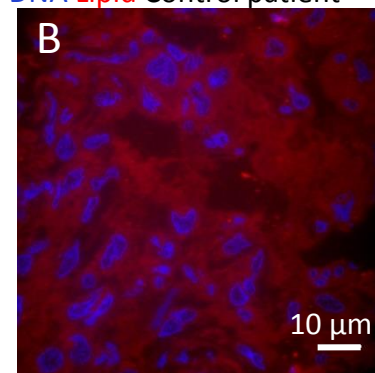

DNA Lipid patient 58

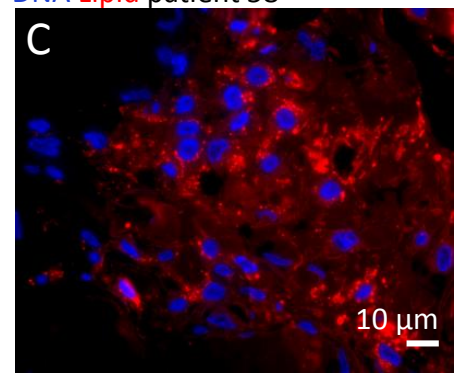

EM patient 58

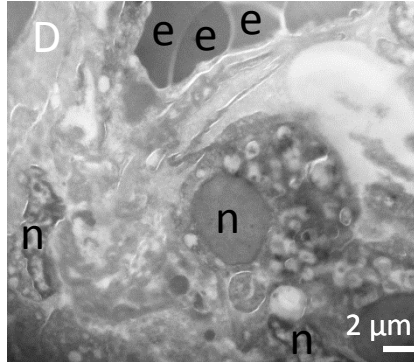

FM DNA Lipid N

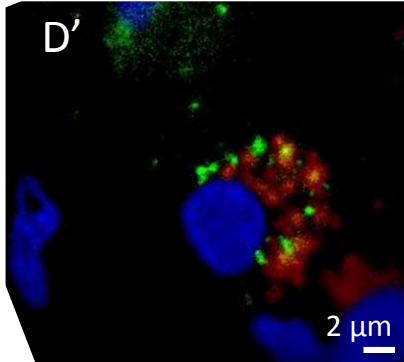

CLEM

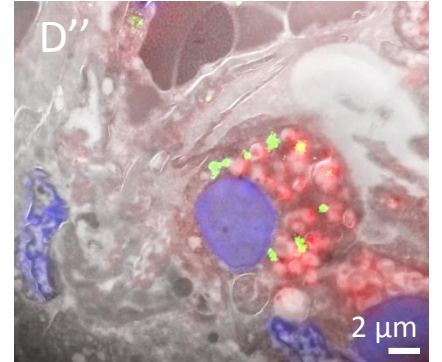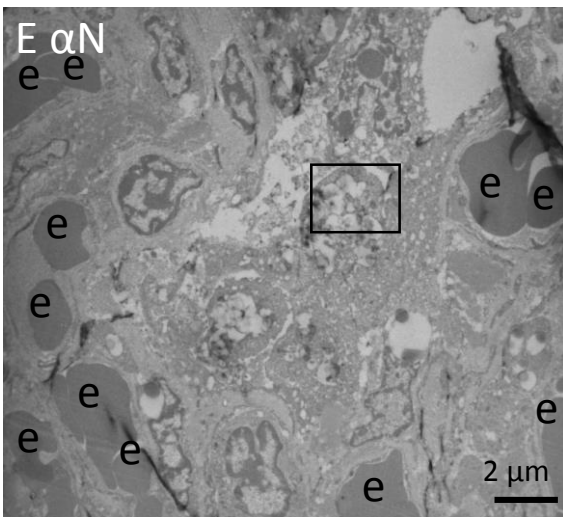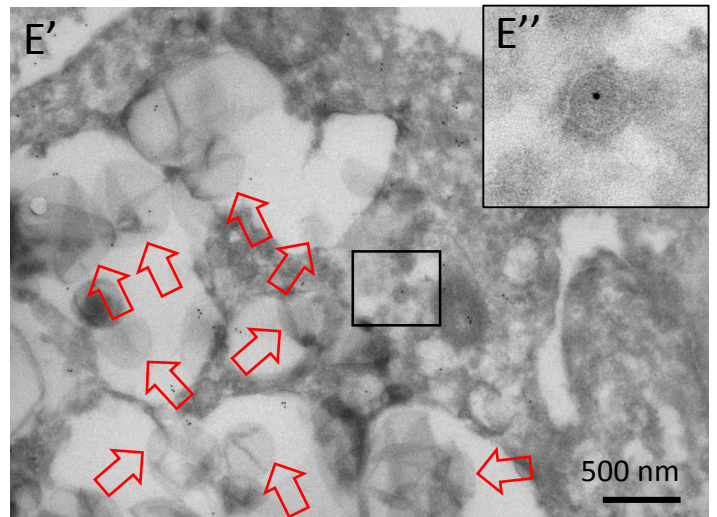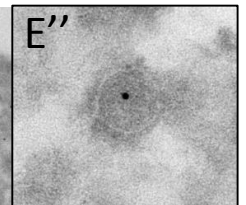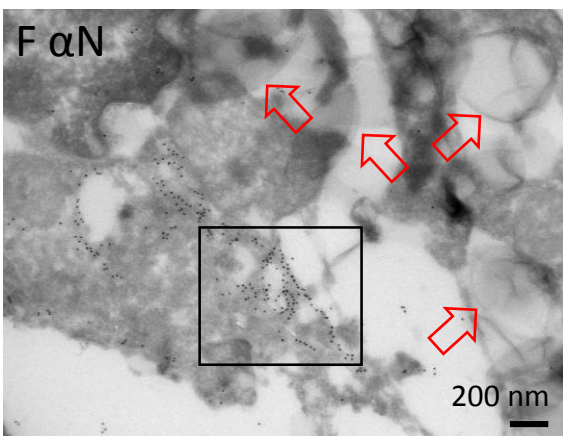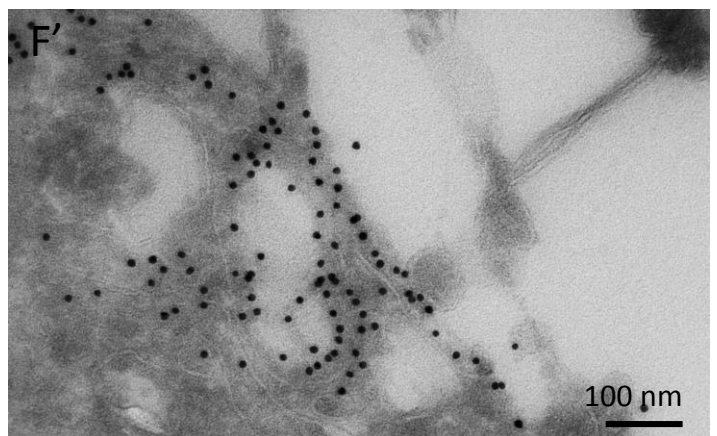



Figure 5

nsp4 DNA

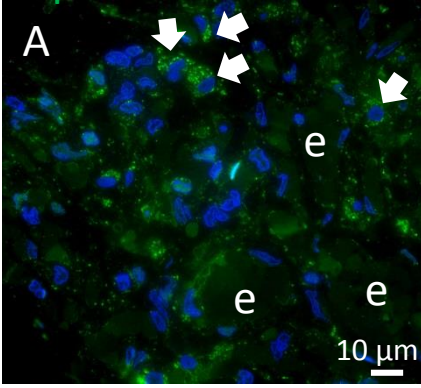

nsp4

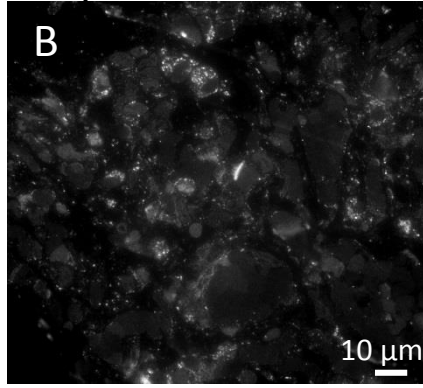

DNA

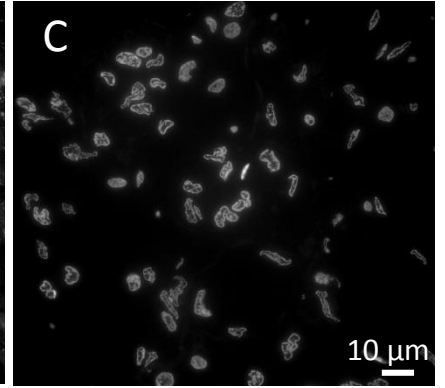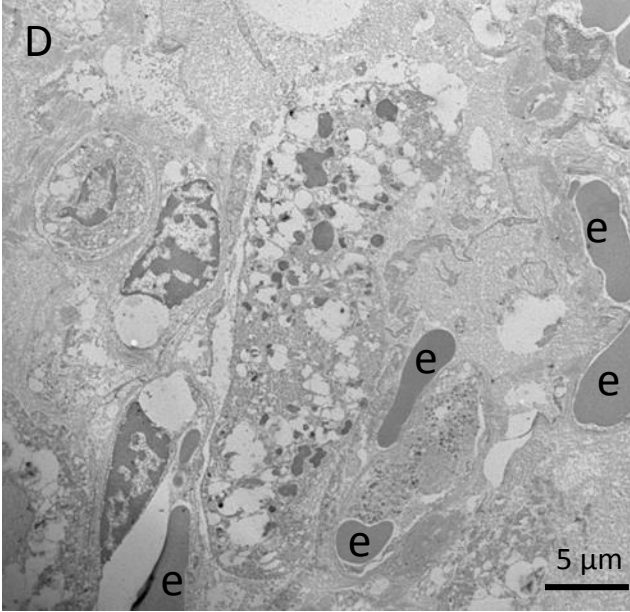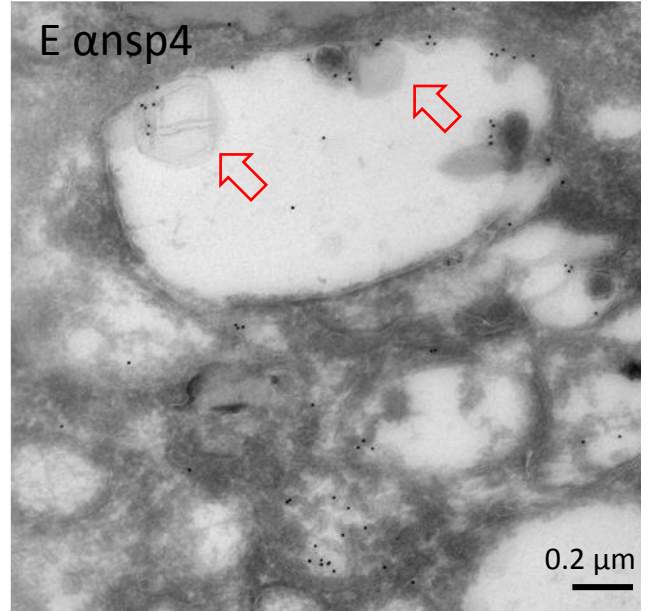

**F**

Uninfected Vero cell

SARS-CoV-2 infected Vero cell

SARS-CoV-2 infected lung

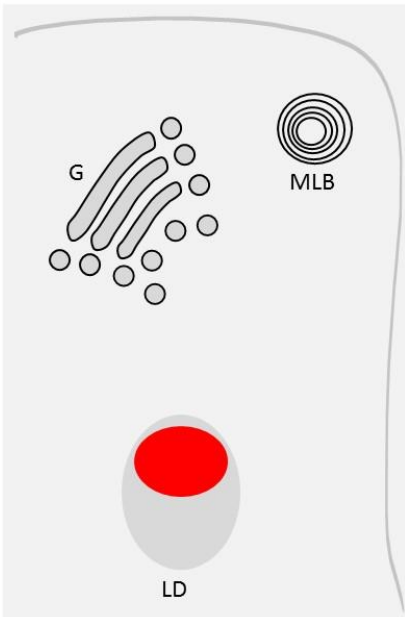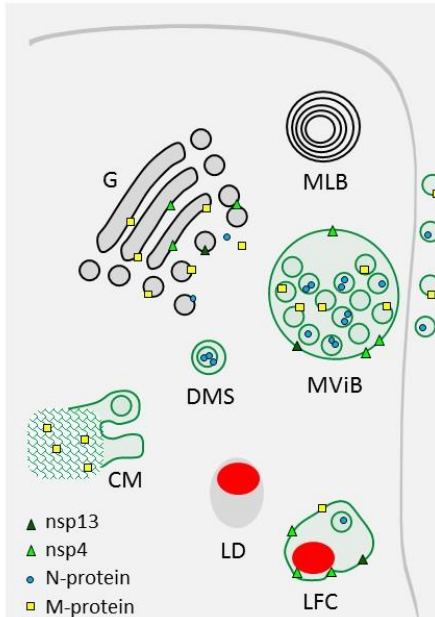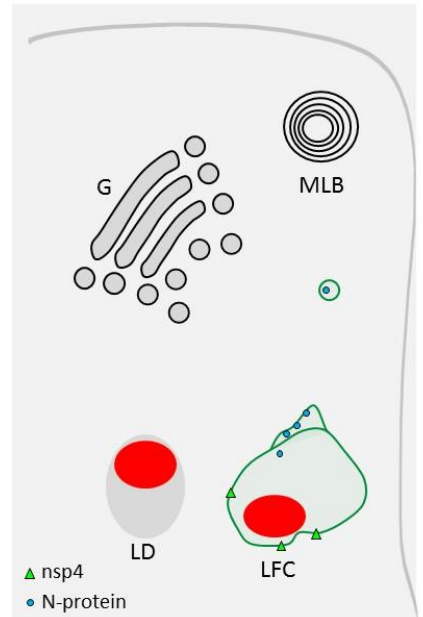

Source: https://www.biorxiv.org/content/10.1101/2021.06.24.449252v1.full.pdf
